# Supplementary material for: Synthesis of homogeneous MUC1 oligomers via a bi-directional ligation strategy
Source: Royal Society of Chemistry journal article supplement (doi:10.1039/c3ob41363b), 2013-01-01
Supplement: c3ob41363b.pdf [file c3ob41363b.pdf]

**Electronic Supplementary Information**

**Synthesis of Homogeneous MUC1 Oligomers  
via a Bi-Directional Ligation Strategy**

*Dima Al Sheikha, Brendan L. Wilkinson, Gajan Santhakumar, Morten Thaysen-Andersen and  
Richard J. Payne\**

*School of Chemistry, The University of Sydney, NSW 2006, AUSTRALIA*

*\*richard.payne@sydney.edu.au*

## Table of Contents

|                                                                                                    |                                     |
|----------------------------------------------------------------------------------------------------|-------------------------------------|
| 1.0 Preparative HPLC gradients .....                                                               | <b>Error! Bookmark not defined.</b> |
| 2.0 SPPS of peptides <b>1-4</b> .....                                                              | 4                                   |
| 3.0 Analytical data .....                                                                          | 5                                   |
| 4.0 N→S thioesterification and ligation using <i>N</i> -ethyl cysteine- derivatised peptides ..... | 25                                  |
| 5.0 References .....                                                                               | 31                                  |
| 5.1 Tabulated mass spectral data .....                                                             | 32                                  |

## 1.0 Preparative HPLC Gradients

Preparative reversed-phase HPLC was performed using a Waters 600 Multisolute Delivery System and Waters 500 pump with 2489 photodiode array detector or Waters 486 Programmable wavelength detector operating at 230 and 214 nm. All purifications used a mobile phase of 0.1% TFA in water (Solvent A) and 0.1% TFA in acetonitrile (Solvent B) unless otherwise noted using a variety of gradients and columns as detailed below:

**Method A:** Purification was performed on a Waters Sunfire™ 5  $\mu\text{m}$  (C-18) preparative column operating at a flow rate of 7  $\text{mL min}^{-1}$  using a linear gradient of 0% to 50% B over 40 min.

**Method B:** Purification was performed on a Waters Sunfire™ 5  $\mu\text{m}$  (C-18) preparative column operating at a flow rate of 7  $\text{mL min}^{-1}$  using a linear gradient of 0% to 40% B over 60 min.

**Method C:** Purification was performed on a Grace Vydac™ 10  $\mu\text{m}$  (C-18) semi-preparative column operating at a flow rate of 4  $\text{mL min}^{-1}$  using a linear gradient of 0% for 10 min to 45% B over 60 min.

**Method D:** Purification was performed on a Waters Sunfire™ 5  $\mu\text{m}$  (C-18) preparative column operating at a flow rate of 7  $\text{mL min}^{-1}$  using a linear gradient of 0% to 30% B over 60 min a mobile phase of 0.1% formic acid in water (Solvent A) and 0.1% formic acid in acetonitrile (Solvent B).

**Method E:** Purification was performed on a Grace Vydac™ 5  $\mu\text{m}$  (C-4) semi-preparative column operating at a flow rate of 4  $\text{mL min}^{-1}$  using a linear gradient of 0% for 10 min to 45% B over 60 min.

**Method F:** Purification was performed on a Waters Sunfire™ 5  $\mu\text{m}$  (C-18) semi-preparative column operating at a flow rate of 4  $\text{mL min}^{-1}$  using a linear gradient of 0% for 10 min to 30% B over 60 min.

**Method G:** Purification was performed on a Waters Sunfire™ 5  $\mu\text{m}$  (C-18) preparative column operating at a flow rate of 7  $\text{mL min}^{-1}$  using a linear gradient of 0% for 10 min to 50% B over 60 min.

**Method H:** Purification was performed on a Grace Vydac™ 5  $\mu\text{m}$  (C-4) semi-preparative column operating at a flow rate of 4  $\text{mL min}^{-1}$  using a linear gradient of 0% to 15% B over 60 min.

**Method J:** Purification was performed on a Waters Sunfire™ 5  $\mu\text{m}$  (C-18) preparative column operating at a flow rate of 7  $\text{mL min}^{-1}$  using a linear gradient of 0% for 10 min to 50% over 60 min.

## 2.0 SPPS of peptides 1-4

Peptides **1-4** were synthesised using microwave assisted Fmoc-SPPS (Scheme 1 and 2).

### 2.1 Solid-phase peptide synthesis (SPPS) of MUC1 peptides **1** and **3**

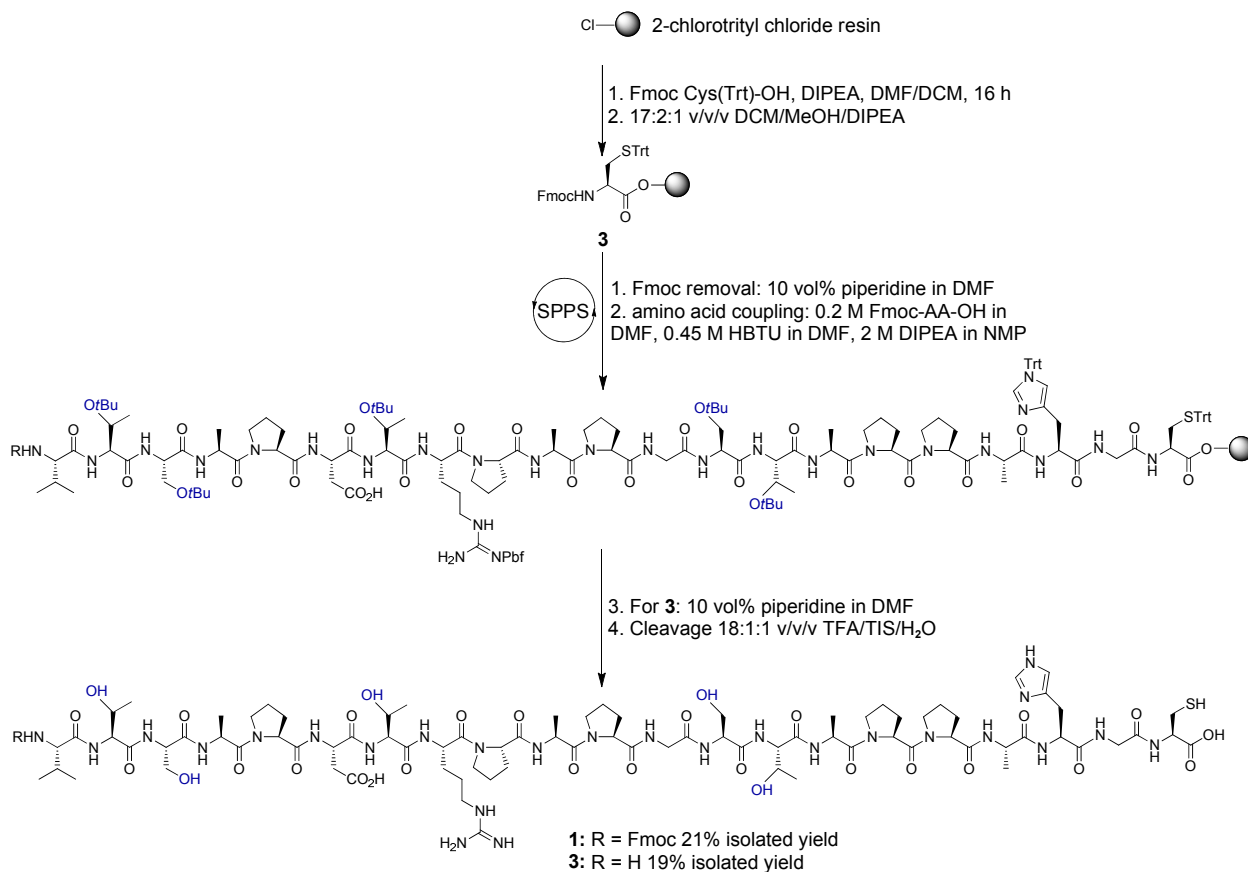

**Scheme S1.** Microwave-assisted Fmoc-SPPS of peptides **1** and **3**.

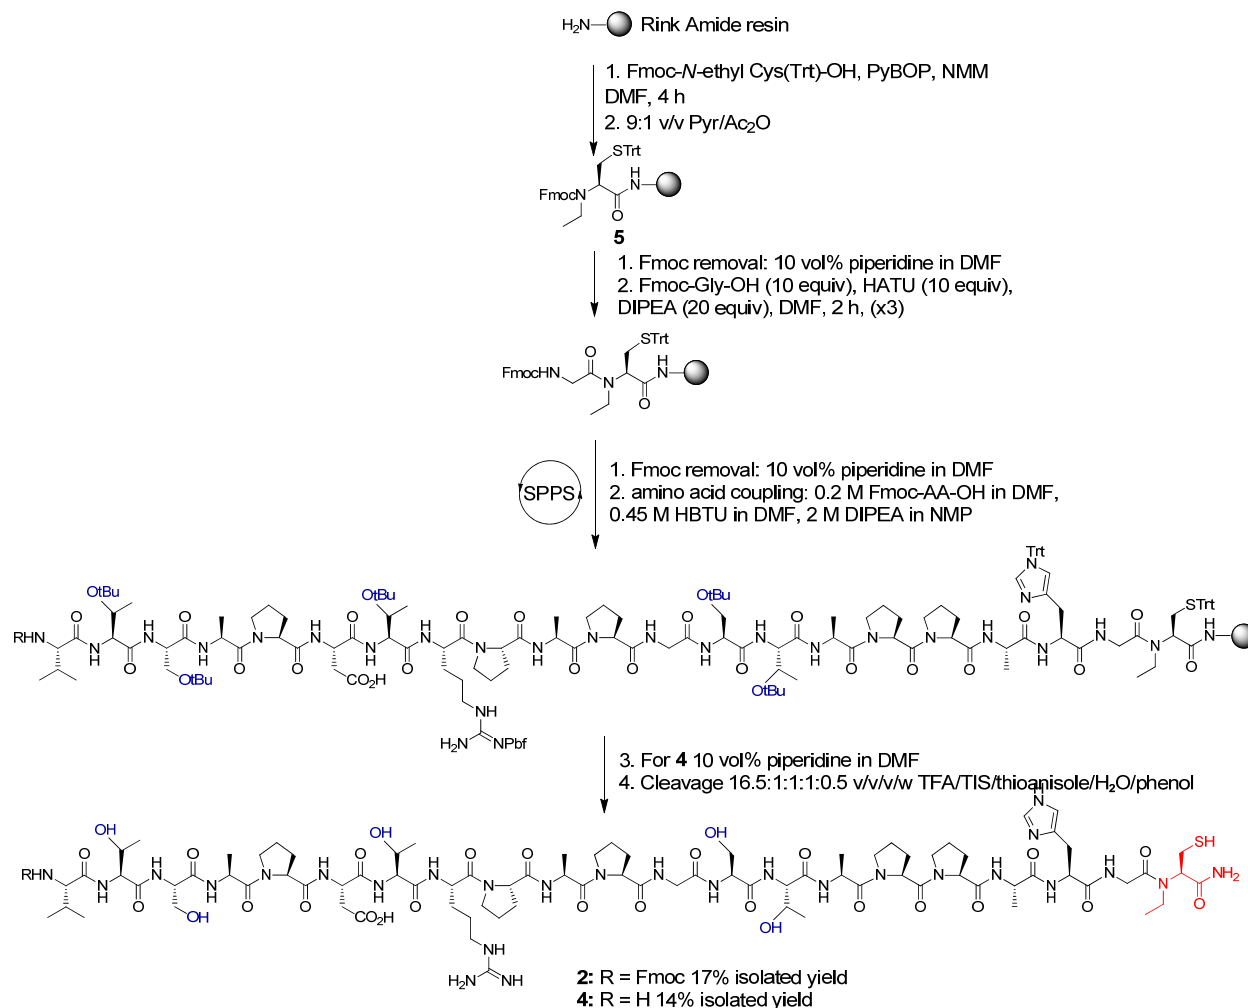

**Scheme S2.** Fmoc-SPPS of peptides **2** and **4** containing a C-terminal N-ethyl cysteine residue.

### 3.0 Analytical data

**Peptide 1:** Fmoc-Val-Thr-Ser-Ala-Pro-Asp-Thr-Arg-Pro-Ala-Pro-Gly-Ser-Thr-Ala-Pro-Pro-Ala-His-Gly-Cys-OH (**1**)

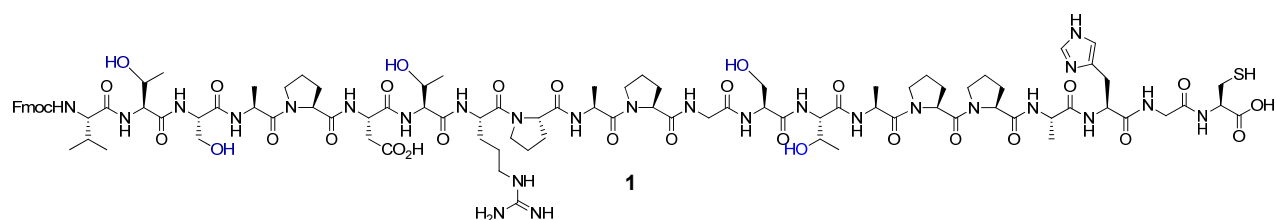

Peptide **1** was prepared according to Fmoc-strategy SPPS on 100  $\mu\text{mol}$  of 2-Cl Trt Cl resin as outlined in the general procedure and purified by preparative reversed-phase HPLC (*Method A*) to give a white solid following lyophilisation (45 mg, 21% isolated yield based on the original resin loading).

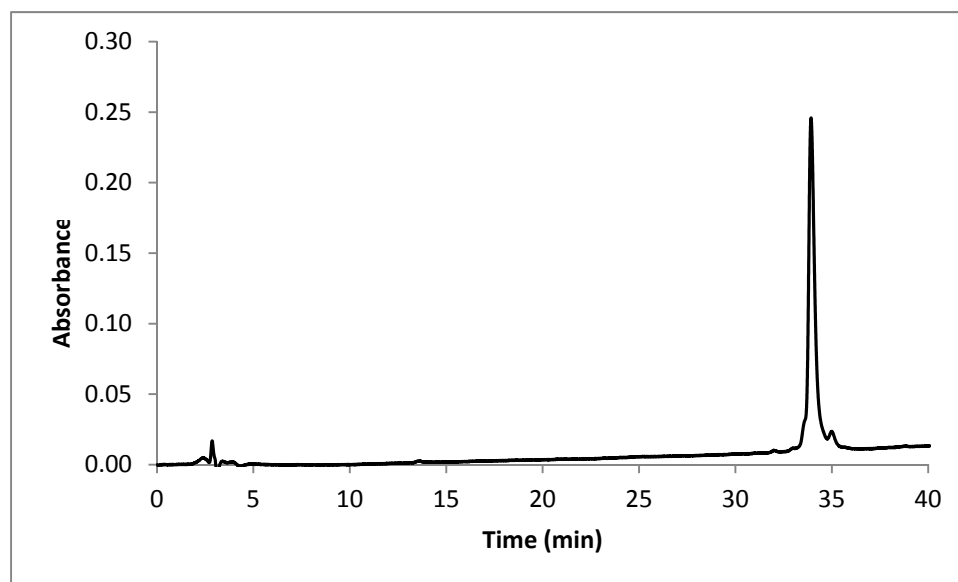

**Figure S1.** Analytical HPLC of peptide **1**:  $R_t = 34$  min (0 to 50% B over 40 min,  $\lambda = 230$  nm).

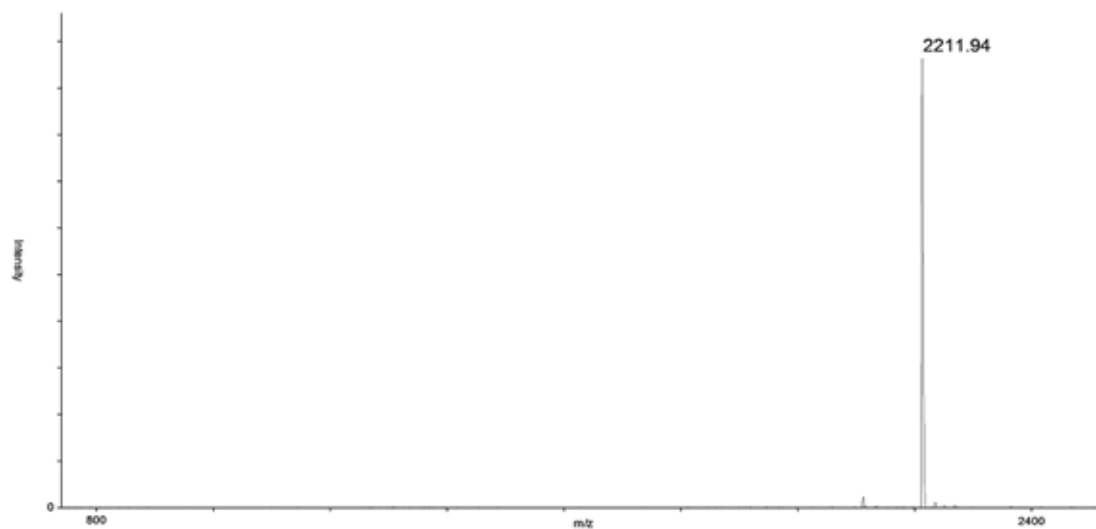

**Figure S2.** MALDI-ToF mass spectrum of peptide **1**.

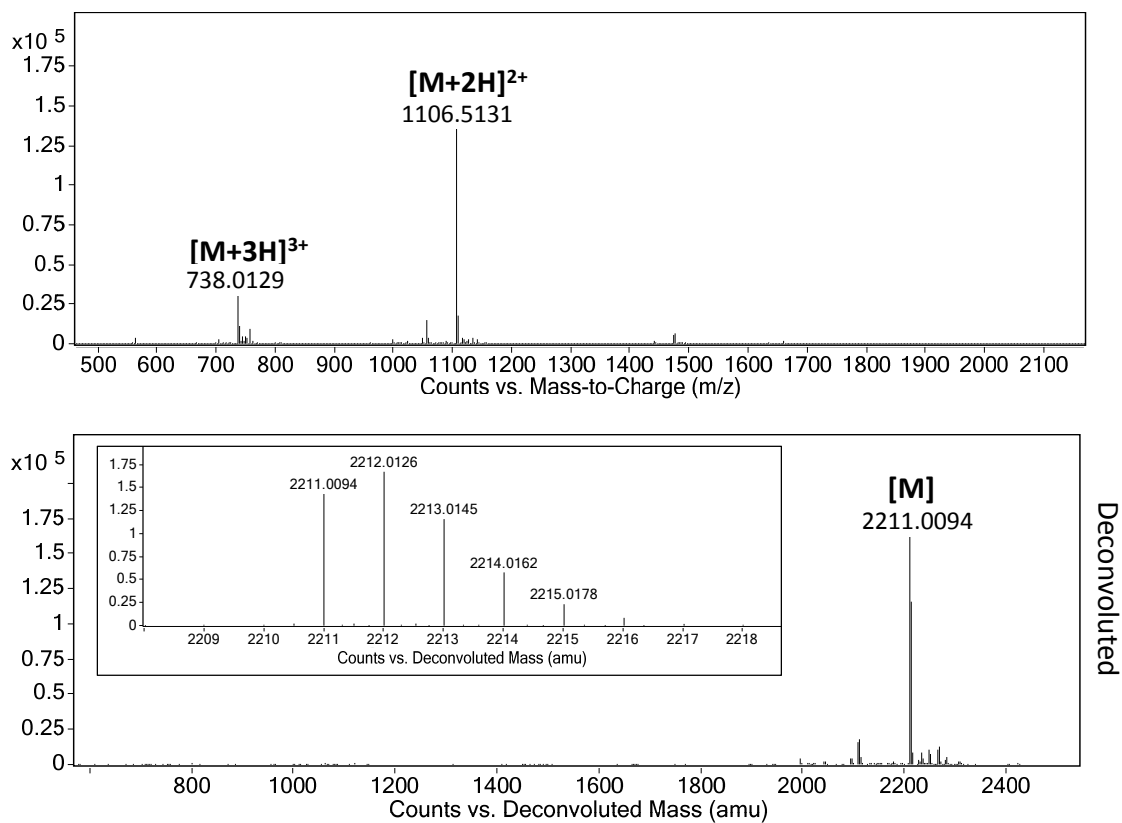

**Figure S3.** ESI-Q-ToF mass spectrum (top) and deconvoluted spectrum (bottom) with zoomed region (inset) of peptide **1**.

**Peptide 2: Fmoc-Val-Thr-Ser-Ala-Pro-Asp-Thr-Arg-Pro-Ala-Pro-Gly-Ser-Thr-Ala-Pro-Pro-Ala-His-Gly-Cys(N-ethyl)-NH<sub>2</sub> (2)**

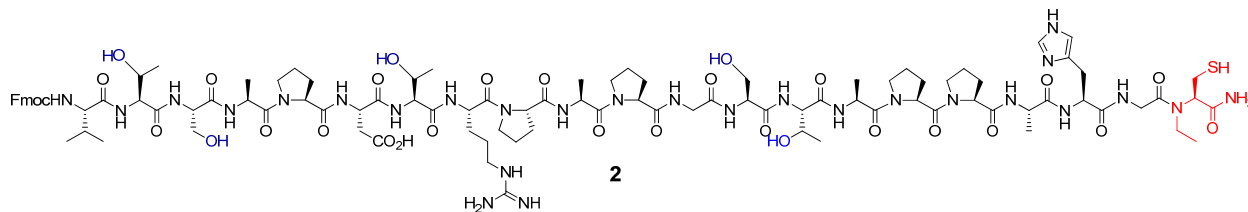

Peptide **2** was prepared according to Fmoc-strategy SPPS on 100  $\mu$ mol of 2-Cl Trt Cl resin as outlined in the general procedure and purified by preparative reversed-phase-HPLC (*Method A*) to give a white solid following lyophilisation (36 mg, 17% isolated yield based on the original resin loading).

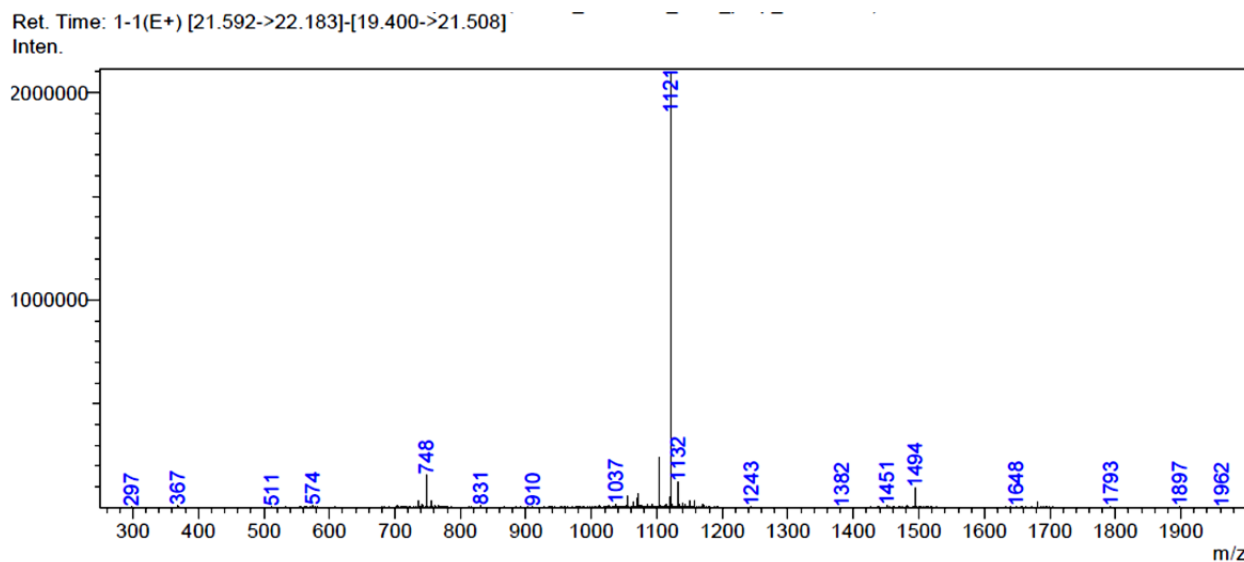

**Figure S4.** ESI-MS spectrum of peptide **2**



**Peptide 3: H-Val-Thr-Ser-Ala-Pro-Asp-Thr-Arg-Pro-Ala-Pro-Gly-Ser-Thr-Ala-Pro-Pro-Ala-His-Gly-Cys-OH (3)**

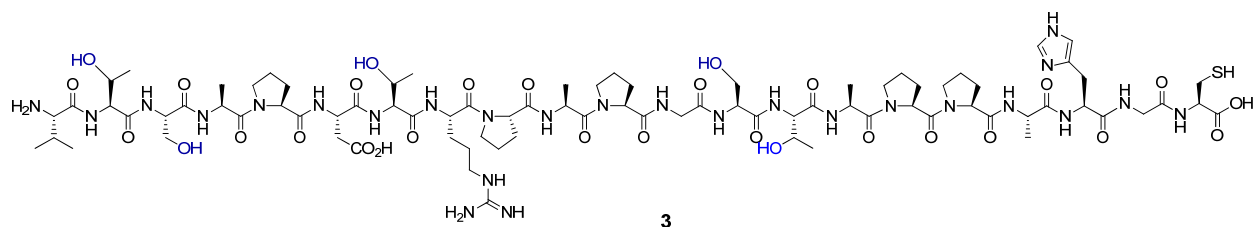

Peptide **3** was prepared according to Fmoc-strategy SPPS outlined in the general procedure purified by preparative RP-HPLC (*Method B*) to give a white solid after lyophilisation (36 mg, 19% isolated yield based on the original resin loading).

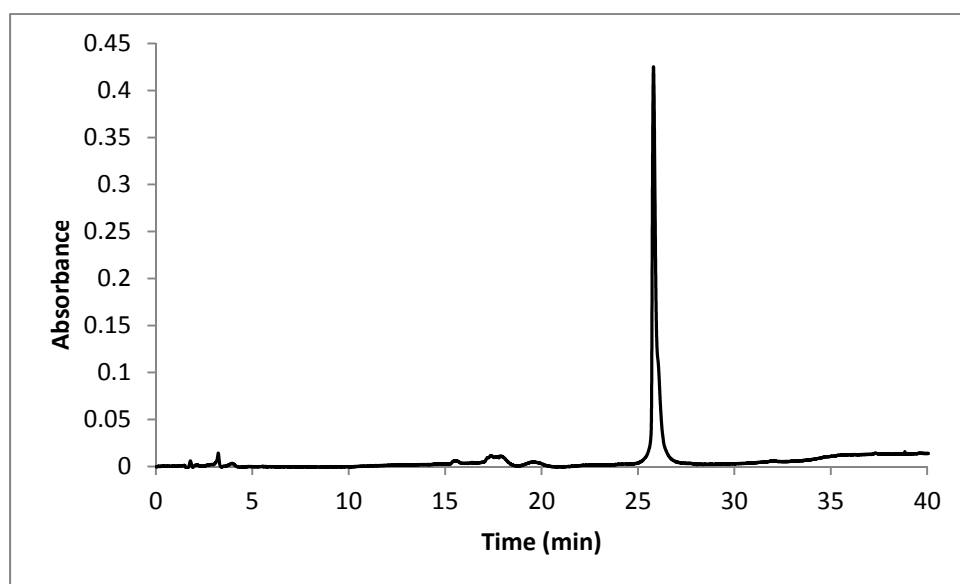

**Figure S5.** Analytical HPLC chromatogram of peptide **3**:  $R_t = 26$  min gradient (0 to 50% B over 40 min,  $\lambda = 230$  nm).

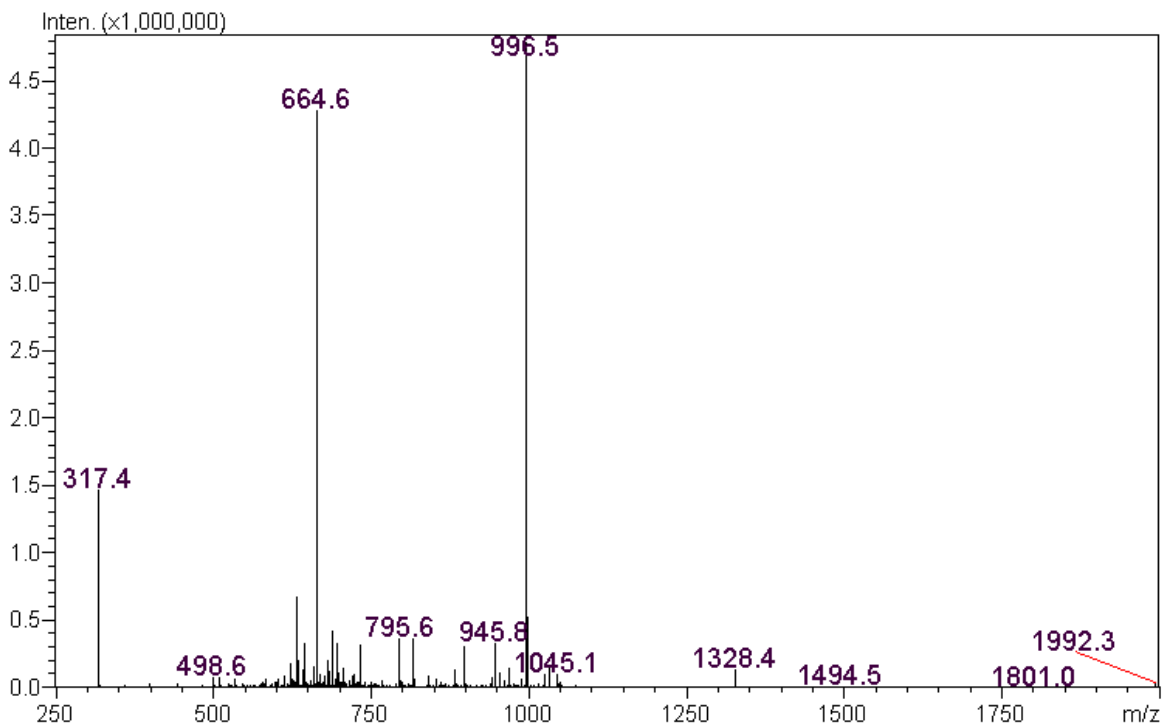

**Figure S6.** ESI-MS spectrum of peptide **2**.

**Peptide 4:** H-Val-Thr-Ser-Ala-Pro-Asp-Thr-Arg-Pro-Ala-Pro-Gly-Ser-Thr-Ala-Pro-Pro-Ala-His-Gly-Cys(*N*-ethyl)-NH<sub>2</sub> (**4**)

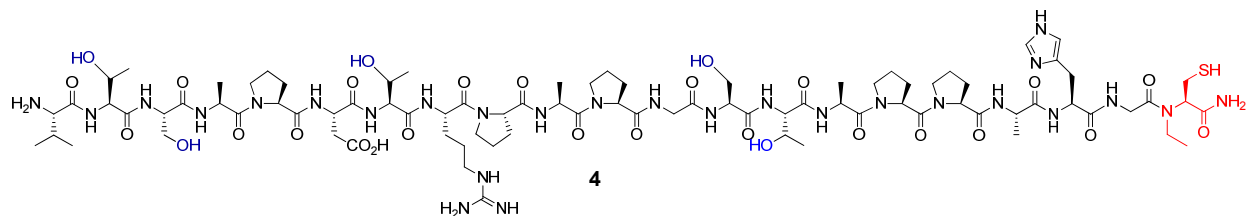

Peptide **4** was prepared according to Fmoc-strategy SPPS outlined in the general procedure and purified by preparative RP-HPLC (*Method B*) to give a white solid after lyophilisation (26 mg, 14% isolated yield based on the original resin loading).

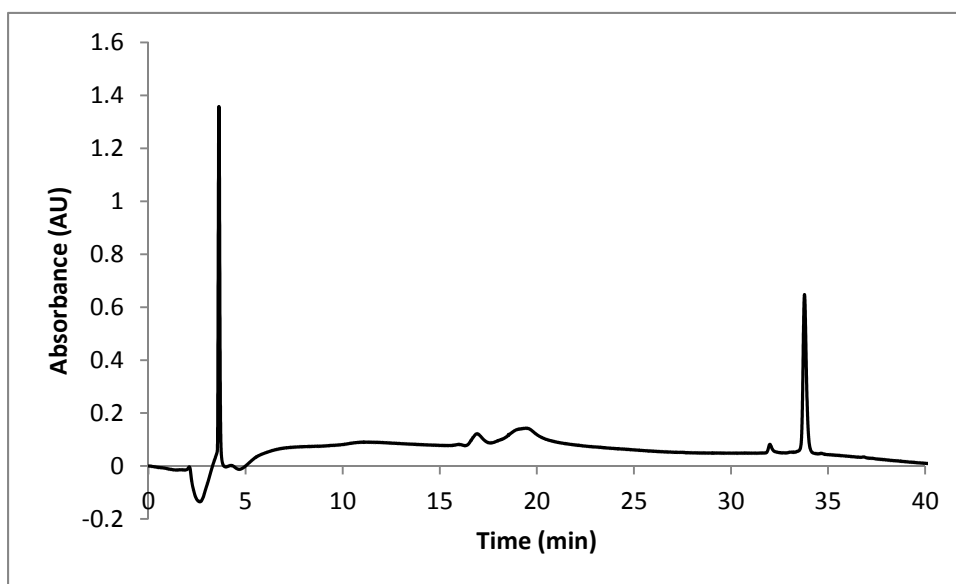

**Figure S7.** Analytical HPLC chromatogram of peptide 4:  $R_t = 33.7$  min gradient (0 to 50% B over 40 min,  $\lambda = 230$  nm).

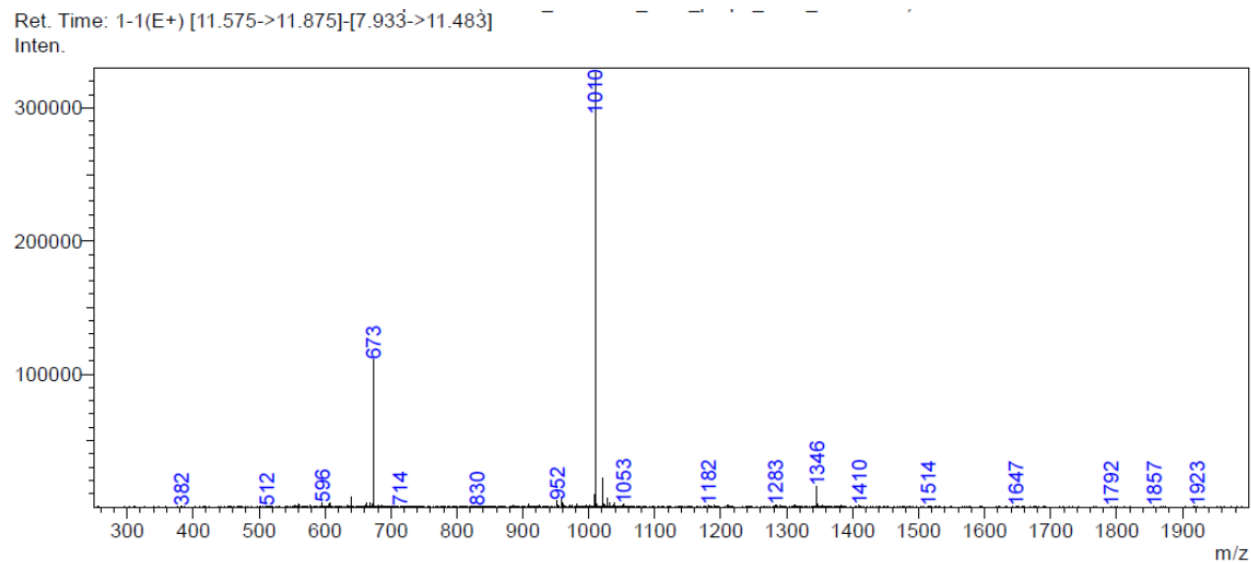

**Figure S8.** ESI-MS spectrum of peptide 4.

**Peptide thioester 6: Fmoc-Val-Thr-Ser-Ala-Pro-Asp-Thr-Arg-Pro-Ala-Pro-Gly-Ser-Thr-Ala-Pro-Pro-Ala-His-Gly- S(CH<sub>2</sub>)<sub>2</sub>SO<sub>3</sub>H (6)**

Peptide **1** (25 mg, 11.3 μmol, 1.0 equiv.) was subjected to the N→S thioesterification conditions outlined in the general procedure to afford peptide thioester **6** as a white solid following purification by RP-HPLC (*Method B*) and lyophilisation (Scheme 3, 11.6 mg, 46% isolated yield).

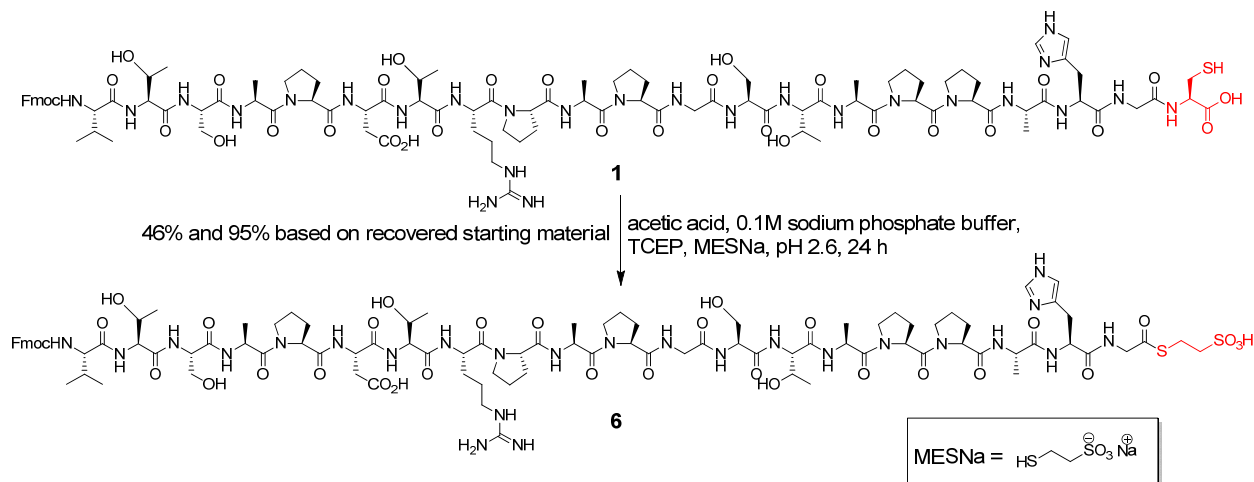

**Scheme S3.** Synthesis of peptide thioester **6** by N→S acyl transfer.

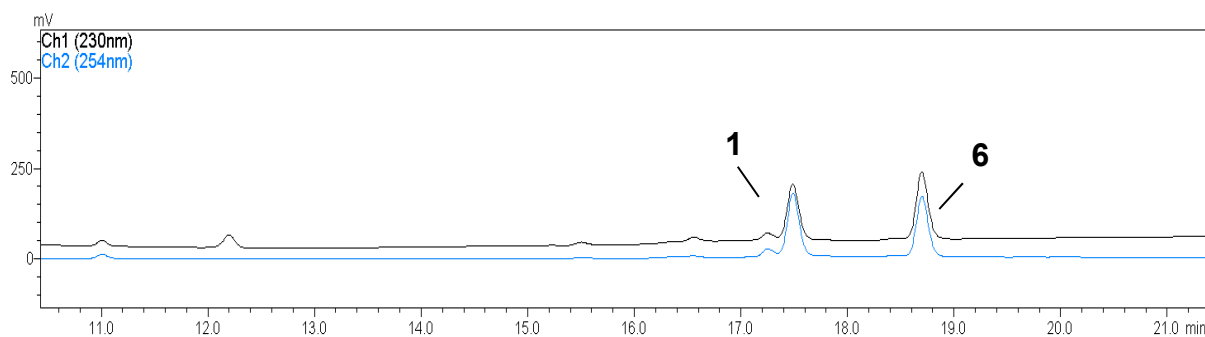

**Figure S9.** Chromatogram extracted from LC-MS of N→S thioesterification reaction after 24 h. (MESNa elutes at  $R_t$  = 2 min).

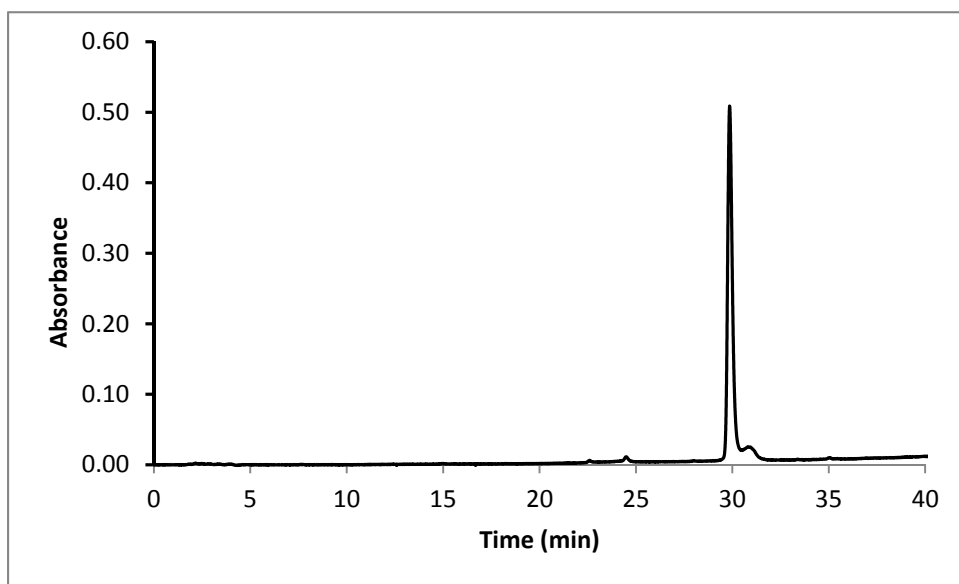

**Figure S10.** Analytical HPLC chromatogram of peptide thioester **6**:  $R_t = 34$  min (0 to 50% B over 40 min,  $\lambda = 230$  nm).

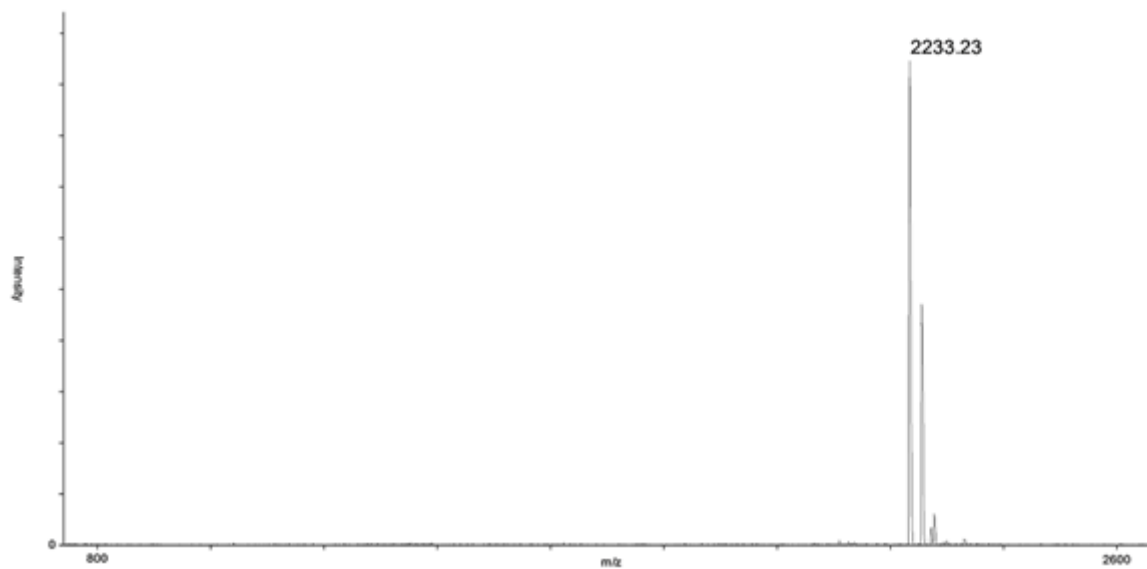

**Figure S11.** MALDI-ToF mass spectrum of peptide thioester **6**.

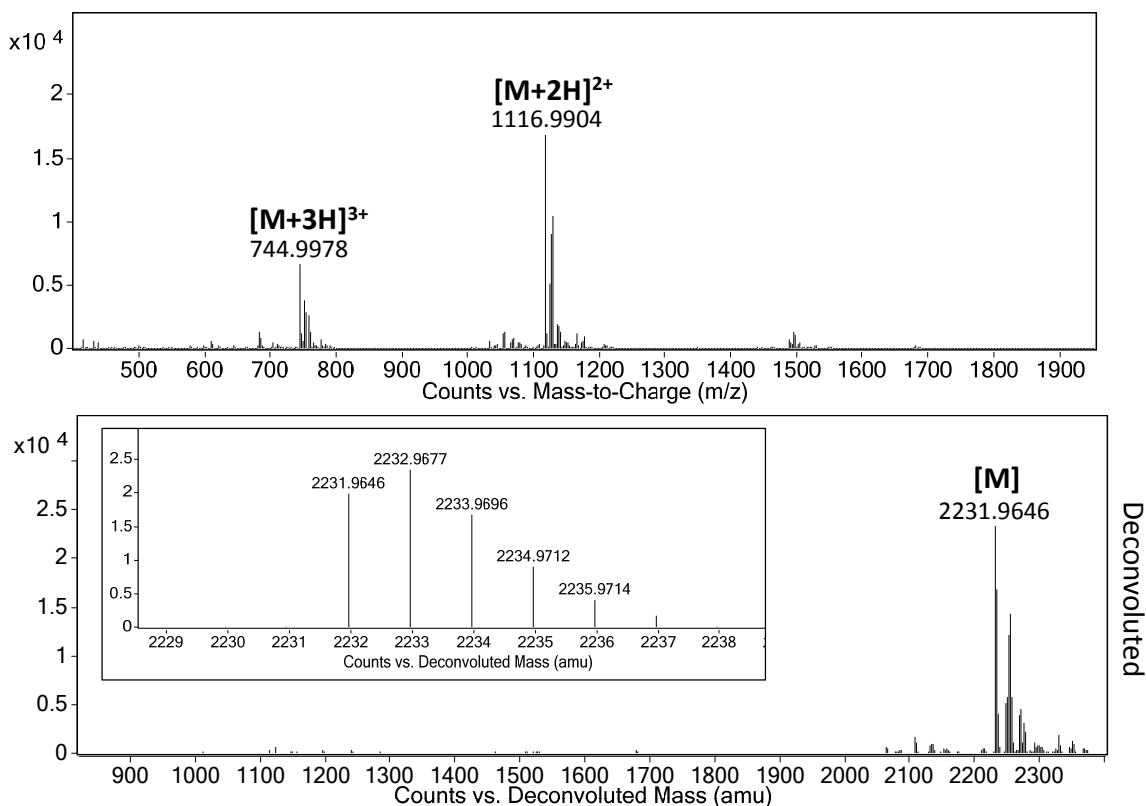

**Figure S12.** ESI-MS spectrum of peptide thioester **6**.

**Peptide 7: H-Val-Thr-Ser-Ala-Pro-Asp-Thr-Arg-Pro-Ala-Pro-Gly-Ser-Thr-Ala-Pro-Pro-Ala-His-Gly-OH (7)**

Peptide thioester **6** (4 mg, 1.79  $\mu$ mol) was treated with 10 mM NaOH (1 mL) and stirred at rt for 48 h. The reaction mixture was lyophilised and treated with 10 vol% piperidine in DMF for 30 min. Subsequent purification by RP-HPLC (*Method F*) and lyophilisation provided the desired peptide **7** as a white solid (2.8 mg, 81%).  $R_t$  = 30 min (0 to 30% B over 60 min).

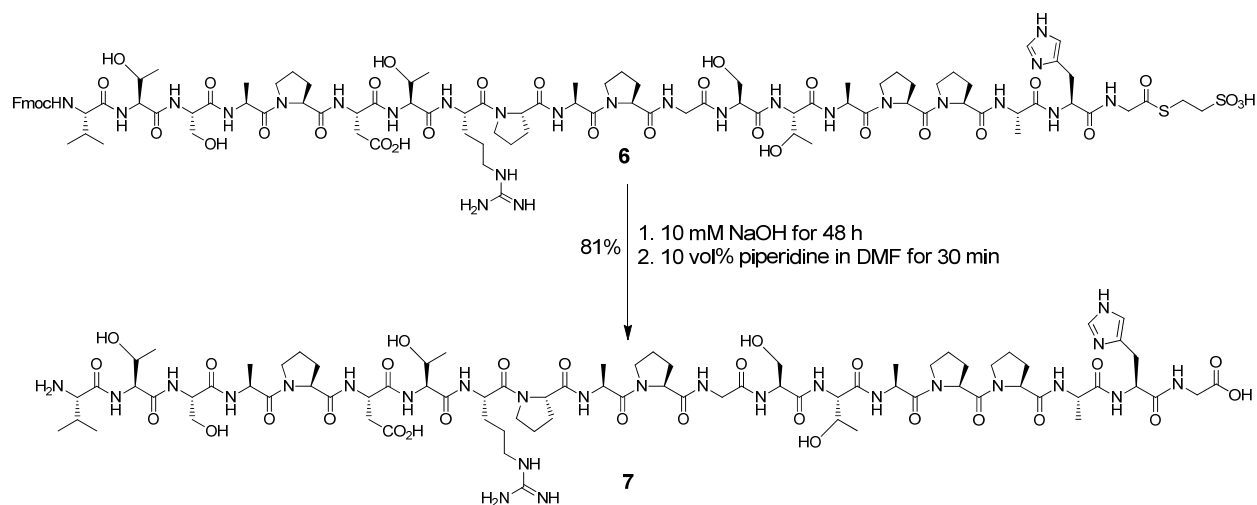

**Scheme S4.** Synthesis of peptide **7**.

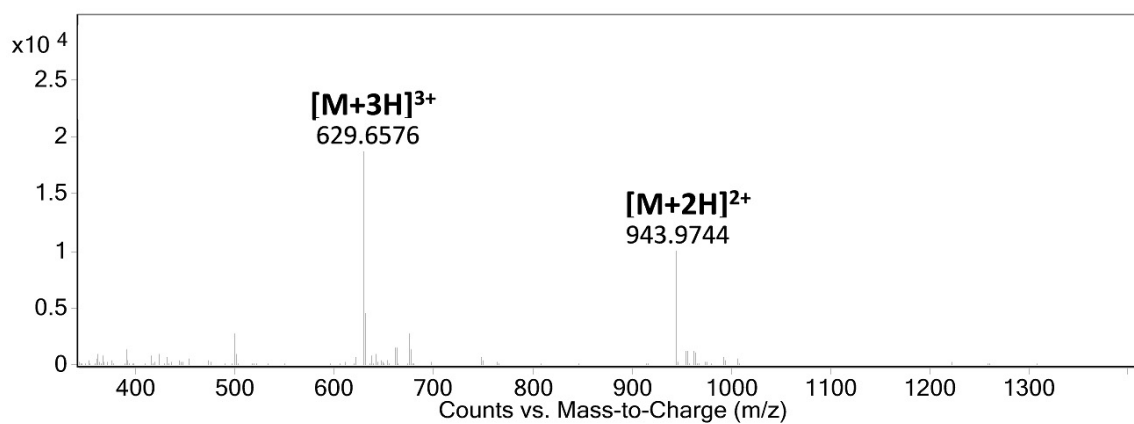

**Figure S13.** ESI-MS spectrum of peptide **7**.

**Peptide 8: Fmoc-Val-Thr-Ser-Ala-Pro-Asp-Thr-Arg-Pro-Ala-Pro-Gly-Ser-Thr-Ala-Pro-Pro-Ala-His-Gly-Val-Thr-Ser-Ala-Pro-Asp-Thr-Arg-Pro-Ala-Pro-Gly-Ser-Thr-Ala-Pro-Pro-Ala-His-Gly-Cys-OH (8)**

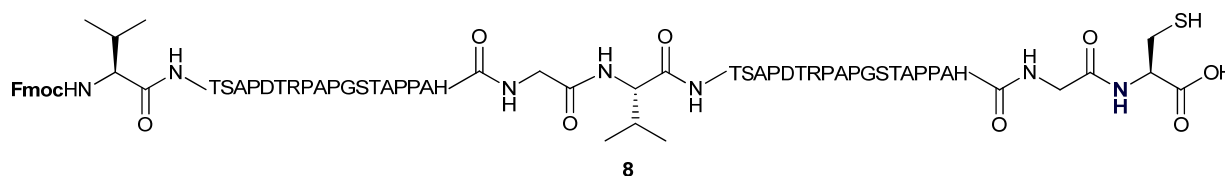

Peptide **8** was prepared by reacting unprotected peptide **3** (2.2 mg, 1.1  $\mu$ mol, 1.0 equiv) and peptide thioester **6** (3 mg, 1.3  $\mu$ mol, 1.2 equiv) *via* the general Ag(I)-assisted ligation procedure (20 h) outlined in the general procedure to give a white solid following purification by preparative RP-HPLC (*Method C*) and lyophilisation (3.5 mg, 77%).

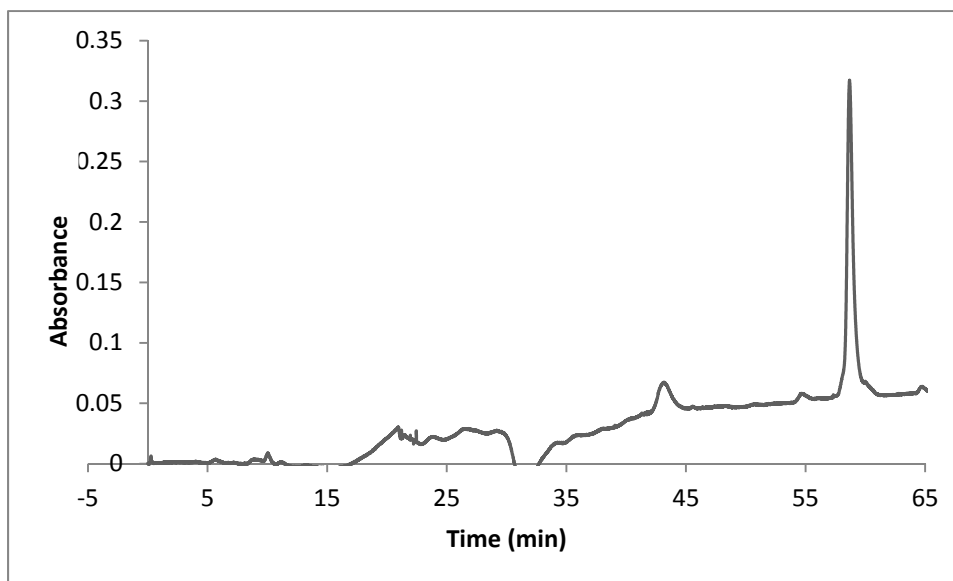

**Figure S14.** Analytical HPLC chromatogram:  $R_t$  = 58 min (0 to 45% B over 60 min).



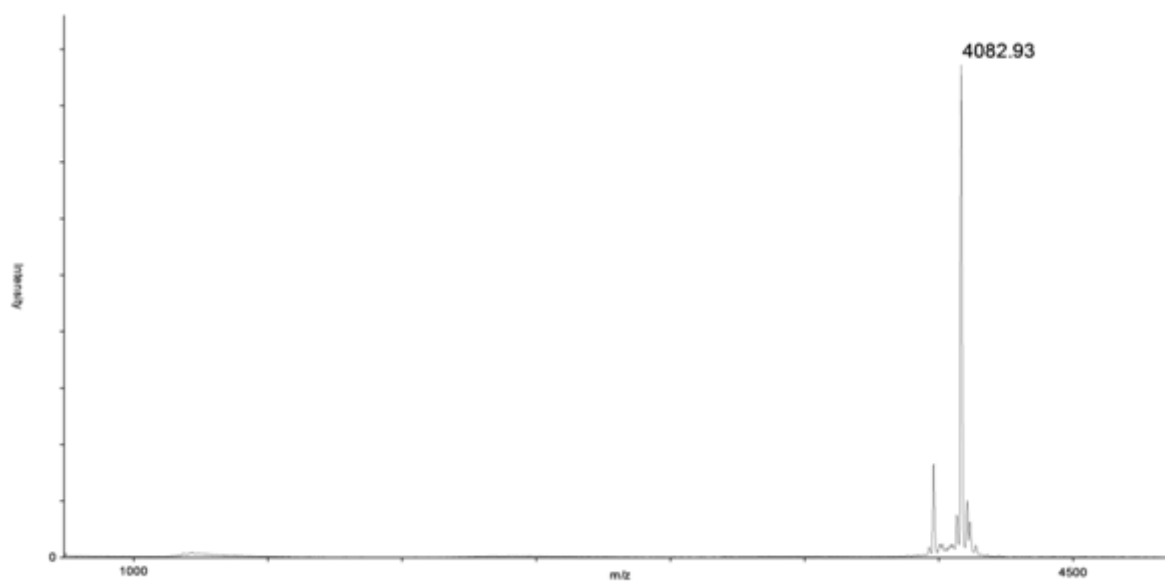

**Figure S15.** MALDI-ToF mass spectrum of peptide **8**.

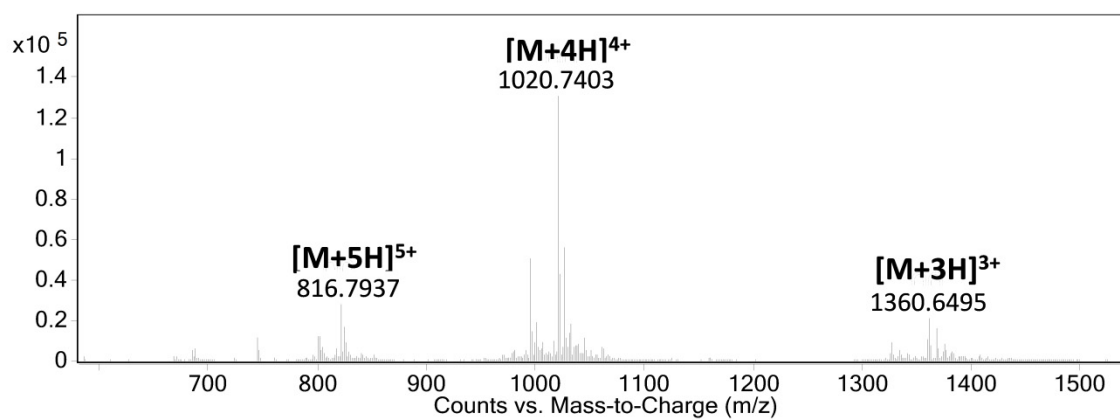

**Figure S15.** ESI-Q-TOF MS of peptide **8**.

**Peptide thioester **10**: Fmoc-Val-Thr-Ser-Ala-Pro-Asp-Thr-Arg-Pro-Ala-Pro-Gly-Ser-Thr-Ala-Pro-Pro-Ala-His-Gly-Val-Thr-Ser-Ala-Pro-Asp-Thr-Arg-Pro-Ala-Pro-Gly-Ser-Thr-Ala-Pro-Pro-Ala-His-Gly-S(CH<sub>2</sub>)<sub>2</sub>SO<sub>3</sub>H (**10**)**

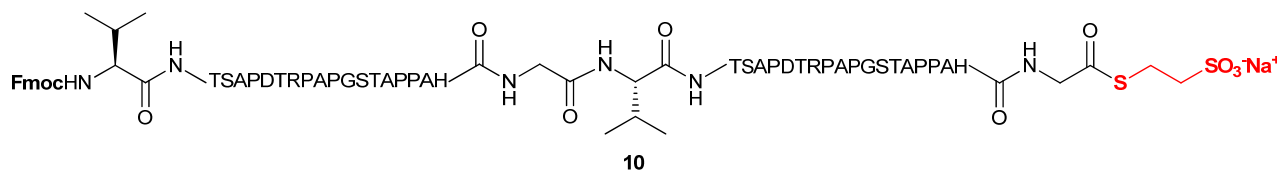

Peptide **8** (17.5 mg, 43.3 μmol, 1.0 equiv.) was subjected to the N→S thioesterification conditions outlined in the general procedure to afford peptide thioester **10** as a white solid following purification by RP-HPLC (*Method D*) and lyophilisation (11.6 mg, 34% isolated yield).

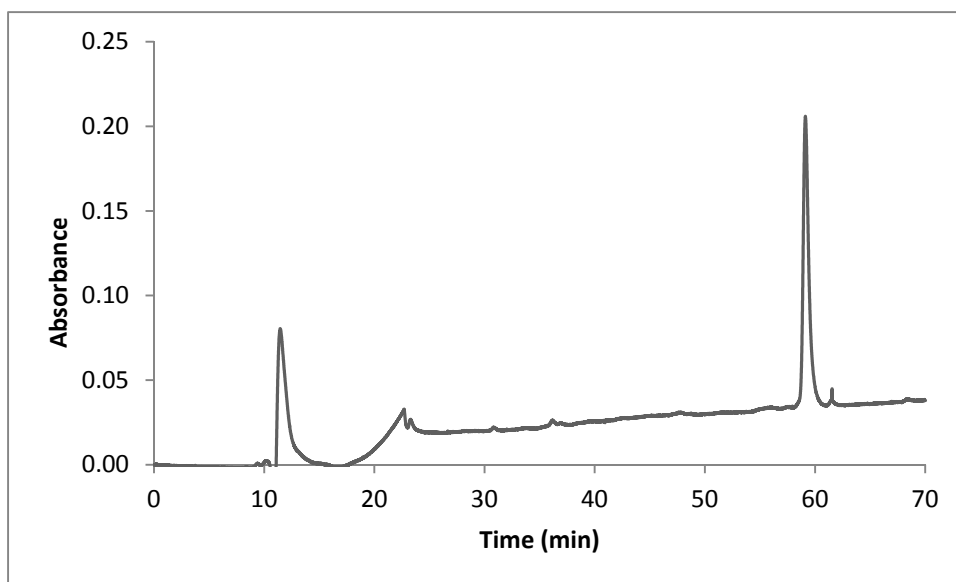

**Figure S16.** Analytical HPLC chromatogram of peptide thioester **10**:  $R_t = 60$  min (0 to 45% B over 60 min).

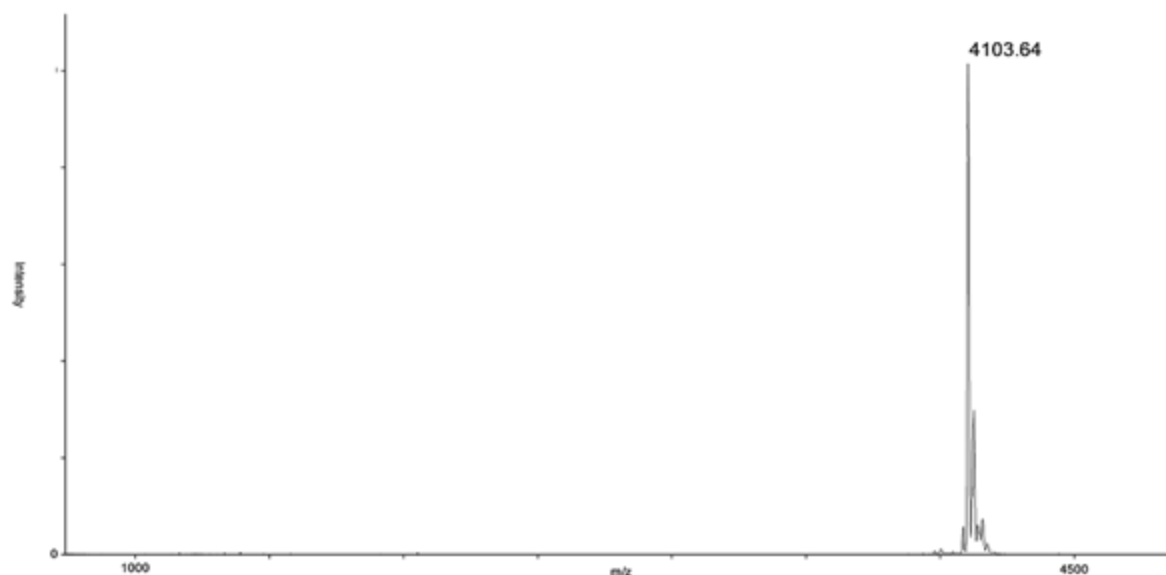

**Figure S17.** MALDI-ToF mass spectrum of peptide thioester **10**.

**Peptide 12:** H-Val-Thr-Ser-Ala-Pro-Asp-Thr-Arg-Pro-Ala-Pro-Gly-Ser-Thr-Ala-Pro-Pro-Ala-His-Gly-Val-Thr-Ser-Ala-Pro-Asp-Thr-Arg-Pro-Ala-Pro-Gly-Ser-Thr-Ala-Pro-Pro-Ala-His-Gly-Val-Thr-Ser-Ala-Pro-Asp-Thr-Arg-Pro-Ala-Pro-Gly-Ser-Thr-Ala-Pro-Pro-Ala-His-Gly-OH (**12**)

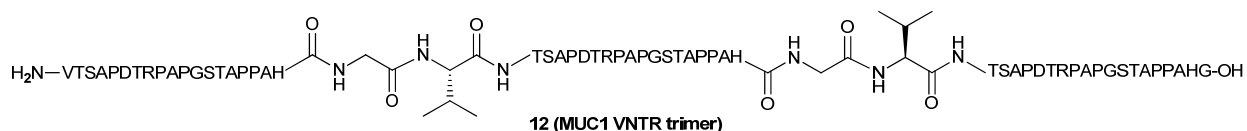

Peptide **12** was prepared by reacting unprotected peptide **7** (1.9 mg, 1.0  $\mu$ mol, 1.0 equiv) and peptide thioester **10** (5 mg, 1.2  $\mu$ mol, 1.2 equiv) *via* the general Ag(I)-assisted ligation procedure outlined in the general procedure (24 h) to give a peptide **11** following purification by preparative RP-HPLC (*Method E*, 3 mg, 0.5  $\mu$ mol, 50%). The lyophilised product was then treated with 10 vol% piperidine in DMF (1 mL) for 30 min and purified by RP-HPLC (*Method H*) to give **12** as a white solid after lyophilisation (2 mg, 36% over two steps).

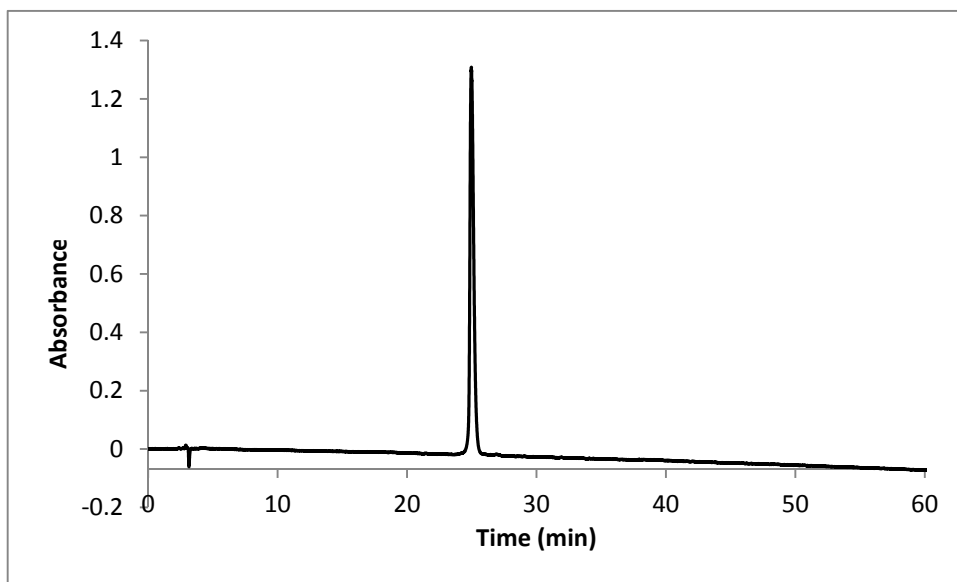

**Figure S18.** Analytical HPLC trace of peptide **12**:  $R_t = 25$  min (0 to 45% B over 60 min).

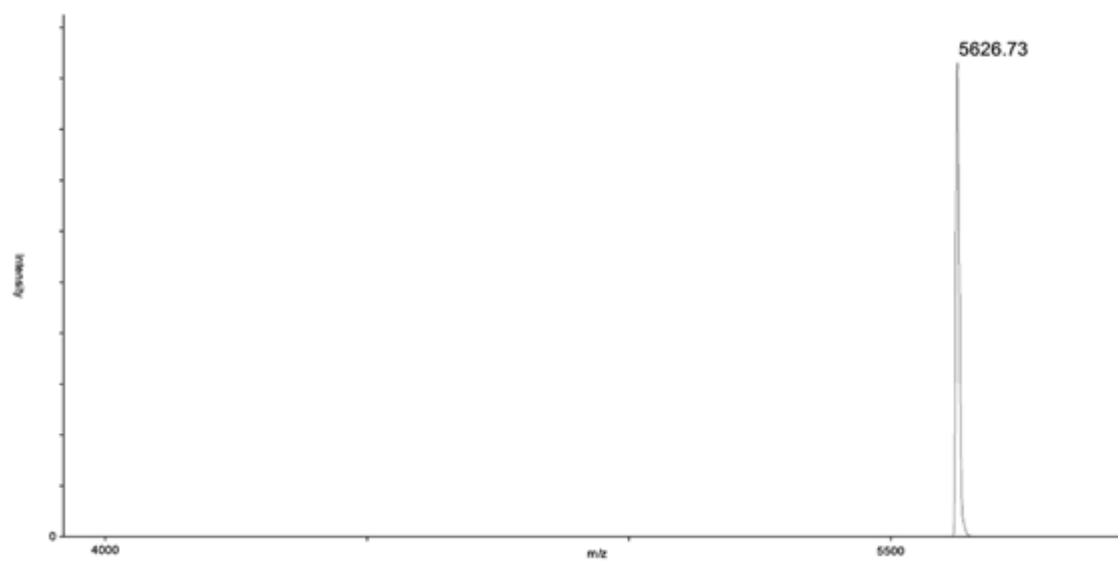

**Figure S19.** MALDI-ToF mass spectrum of peptide **12**.

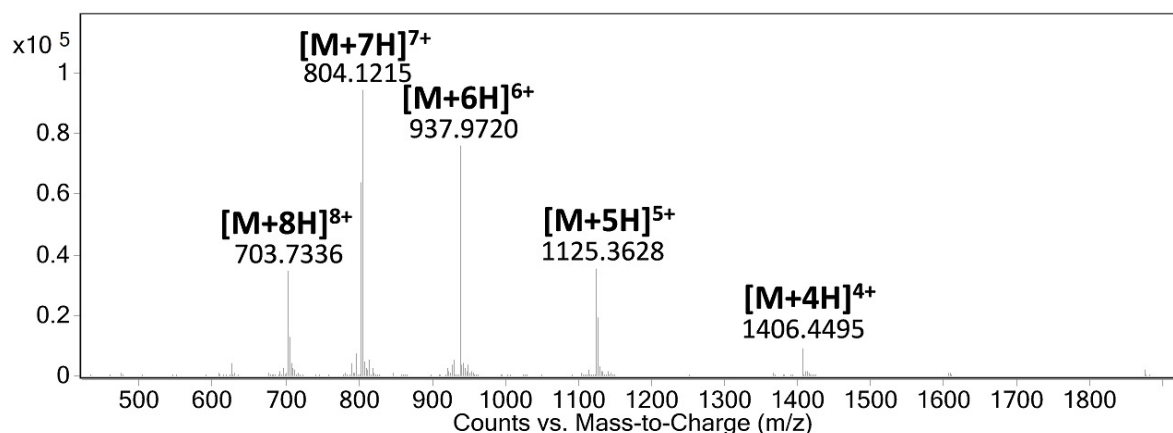

**Figure S20.** ESI-Q-ToF spectrum of peptide **12**.

**Peptide 13:** H-Val-Thr-Ser-Ala-Pro-Asp-Thr-Arg-Pro-Ala-Pro-Gly-Ser-Thr-Ala-Pro-Pro-Ala-His-Gly-Val-Thr-Ser-Ala-Pro-Asp-Thr-Arg-Pro-Ala-Pro-Gly-Ser-Thr-Ala-Pro-Pro-Ala-His-Gly-Val-Thr-Ser-Ala-Pro-Asp-Thr-Arg-Pro-Ala-Pro-Gly-Ser-Thr-Ala-Pro-Pro-Ala-His-Gly-OH (**13**)

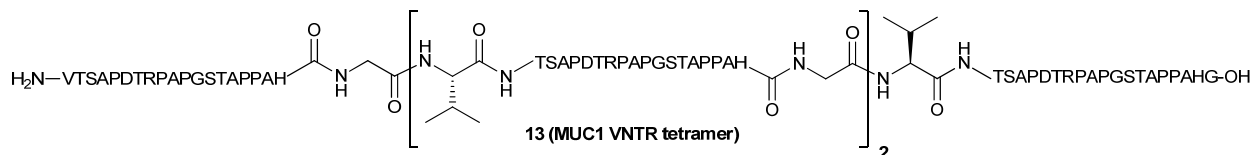

Peptide **13** was prepared by reacting unprotected peptide **12** (3 mg, 0.53  $\mu$ mol, 1.0 equiv) and peptide thioester **6** (1.4 mg, 0.64  $\mu$ mol, 1.2 equiv) *via* the general Ag(I)-assisted ligation procedure outlined in the general procedure (24 h) and purified by preparative RP-HPLC (*Method E*). The lyophilised product was then treated with 10 vol% piperidine in DMF (1 mL) for 30 min and purified by RP-HPLC (*Method E*) to give **13** white solid after lyophilisation (3 mg, 75% over two steps).

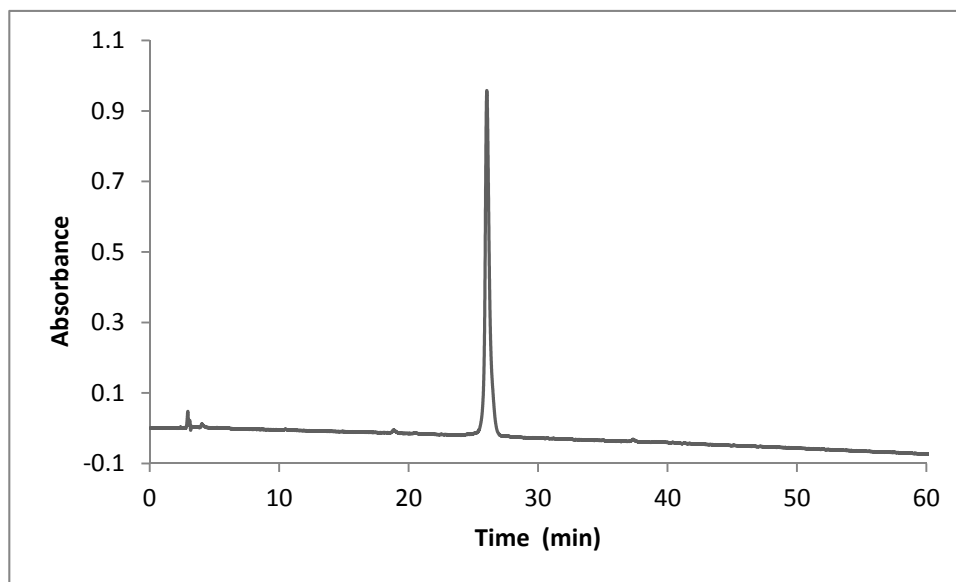

**Figure S21.** Analytical HPLC trace of peptide **13**:  $R_t = 26$  min (0 to 45% B over 60 min).

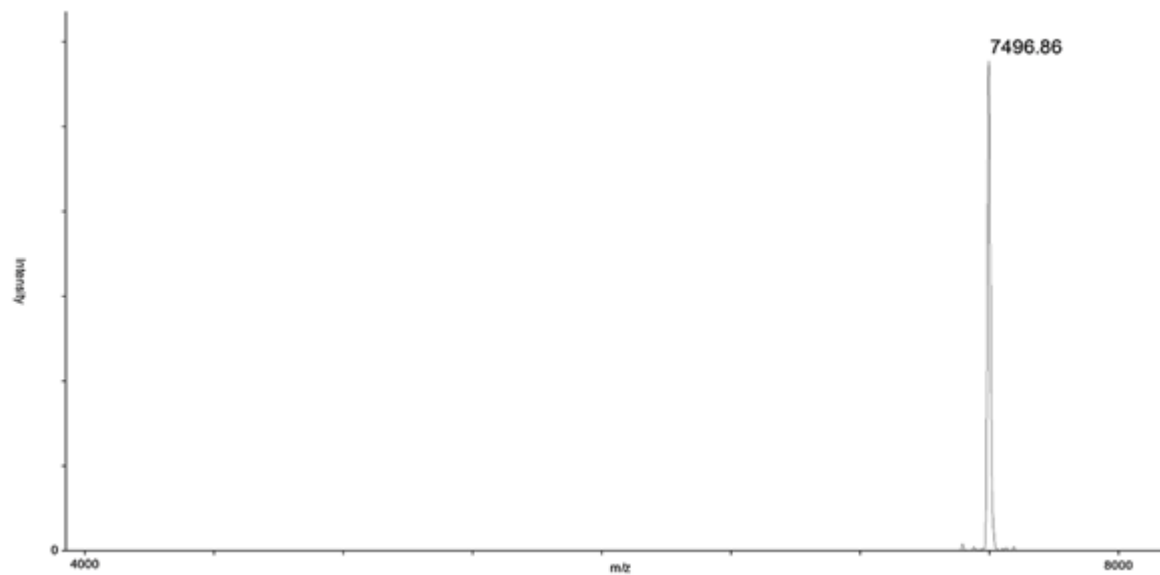

**Figure S22.** MALDI-ToF mass spectrum of peptide **13**.



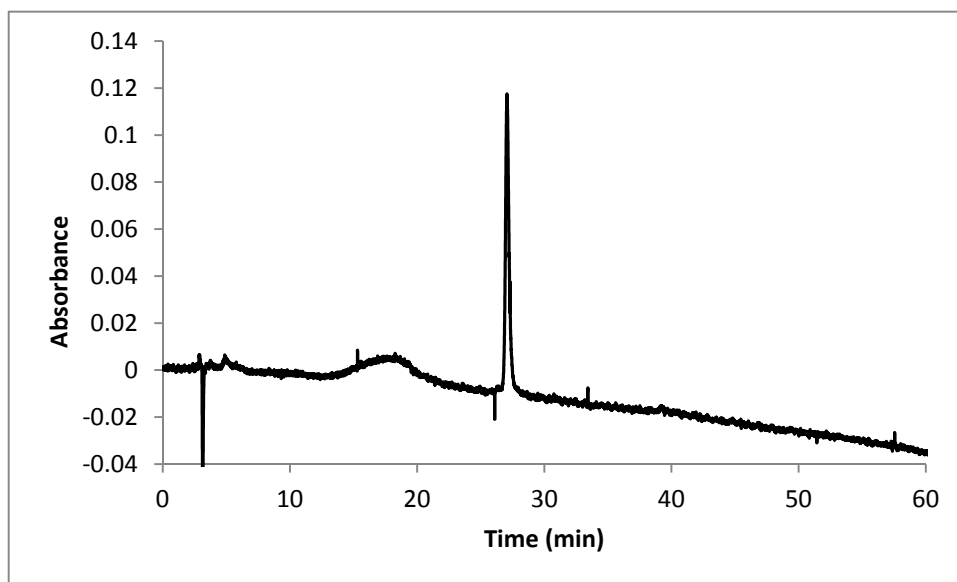

**Figure S24.** Analytical HPLC trace of peptide **14**:  $R_t = 28$  min (0 to 45% B over 60 min).

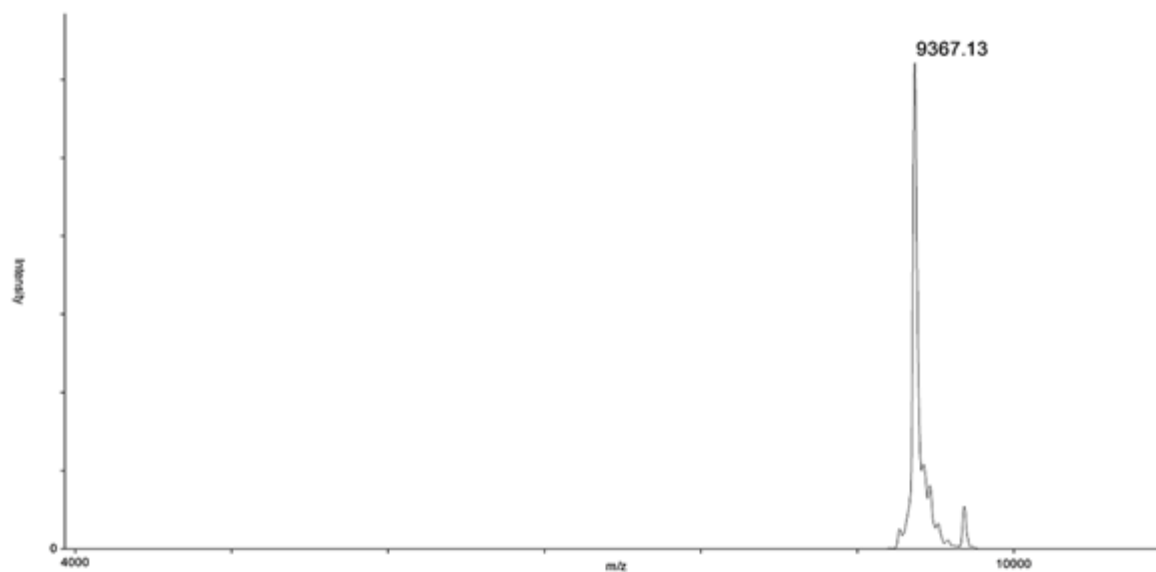

**Figure S25.** MALDI-ToF mass spectrum of peptide **14**.



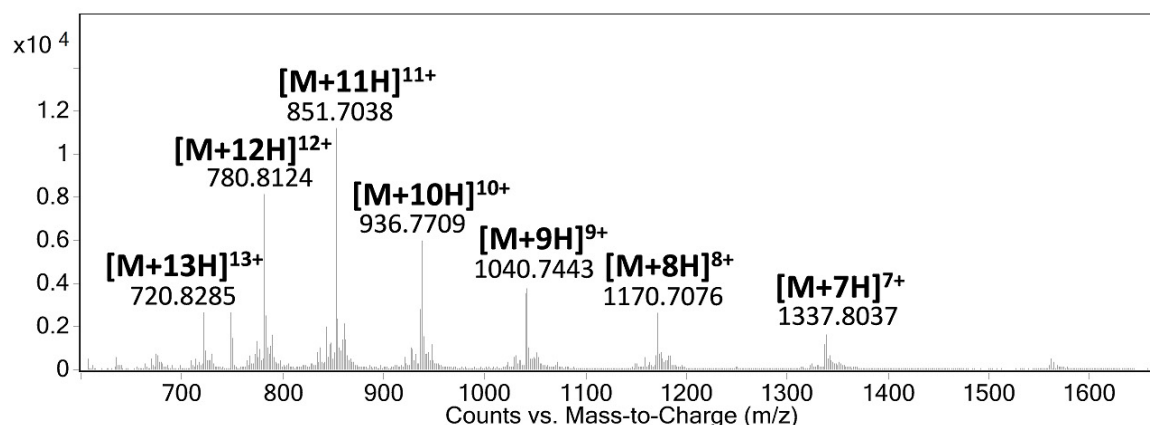

**Figure S26.** ESI-Q-ToF spectrum of peptide **14**.

## 4.0 N→S thioesterification and ligation using *N*-ethyl cysteine- derivatised peptides

### 4.1 *N*-Ethyl-S-Trityl-L-Cysteine

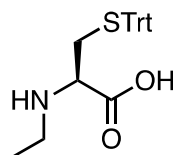

To a cooled (0 °C) suspension of S-Trityl-L-cysteine (2 g, 3.41 mmol) and NaBH<sub>3</sub>CN (0.21 g, 3.41 mmol) in MeOH (6 ml) was added acetaldehyde (289 µl, 5.15 mmol). The resulting solution was allowed to stir at rt for 1 h, after which the RM was concentrated *in vacuo*, and the residue was taken up in 1-butanol. The organic layer was washed with distilled water (2 x 10 ml) and brine (2 x 10 ml). The organic layer was collected, dried and concentrated *in vacuo*. The crude material was purified via flash column chromatography (10% MeOH in CH<sub>2</sub>Cl<sub>2</sub>) to yield a white solid (1.2g, 80%) [ $\alpha$ ]<sub>D</sub> = +25.3 ° (*c* 1.1 in CHCl<sub>3</sub>), <sup>1</sup>H NMR (500 MHz, CDCl<sub>3</sub>) δ 7.44 – 7.29 (5H, m, Trt), 7.24 – 7.16 (10H, m, Trt), 3.05 (1H, m, α-H), 2.77 (2H, m, β-H), 2.52 (2H, m, Et), 1.12 (3H, m, Et). These data are consistent with those previously reported by Hironobu *et al*<sup>1</sup>

## 4.2 Fmoc-N-Ethyl-S-Trityl-L-Cysteine

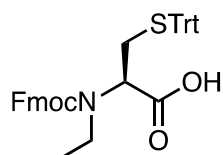

N-Ethyl-S-Trityl-L-Cysteine (436.3 mg, 1.12mmol) was dissolved in 10%  $\text{Na}(\text{CO}_3)_{2(\text{aq})}$  solution (6 ml) and 1,2-DME (3 ml). Fmoc-OSuc (639 mg, 1.79 mmol) dissolved in 1,2-DME (3 ml) was added to the reaction mixture. This was then allowed to stir for 16 h, after which it was filtered and the filtrate was neutralized with 1 M HCl. This was then extracted with EtOAc (3 x 5 ml), the organic layers were collected, dried and concentrated *in vacuo*. The crude material was purified via flash column chromatography (30vol.% EtOAc in Hexane with 1vol.% AcOH) to afford the title compound as a white solid (480 mg, 70%).  $[\alpha]_D = -35.7^\circ$  ( $c$  1.1 in  $\text{CHCl}_3$ ),  $^1\text{H}$  NMR (300 MHz,  $\text{CDCl}_3$ )  $\delta$  7.71 (2H, d,  $J_{\text{HH}} = 9$  Hz, Fmoc), 7.52 (2H, d,  $J_{\text{HH}} = 9$  Hz, Fmoc), 7.44 – 7.37 (7H, m, Fmoc + Trt), 7.33 – 7.12 (13H, m, Fmoc + Trt), 4.50 – 4.32 (2H, m, Fmoc- $\text{CH}_2$ ), 4.20 (0.6H, m, Fmoc-CH), 4.10 (0.4H, m, Fmoc-CH), 3.46 – 3.27 (0.4H, m, Et), 3.25 – 3.22 (0.6H, m, Et), 3.14 (0.6H, m, a-H), 3.08 (0.3H, m, a-H), 2.93 – 2.84 (1.2H, m, b-H), 2.75 – 2.63 (1.4H, m, Et + b-H), 2.45 (0.4H, 1H, b-H), 0.93 – 0.85 (3H, m, Et). These data are consistent with those previously reported by Hironobu *et al.*<sup>1</sup>

## 4.3 Thioesterification by N→S acyl transfer

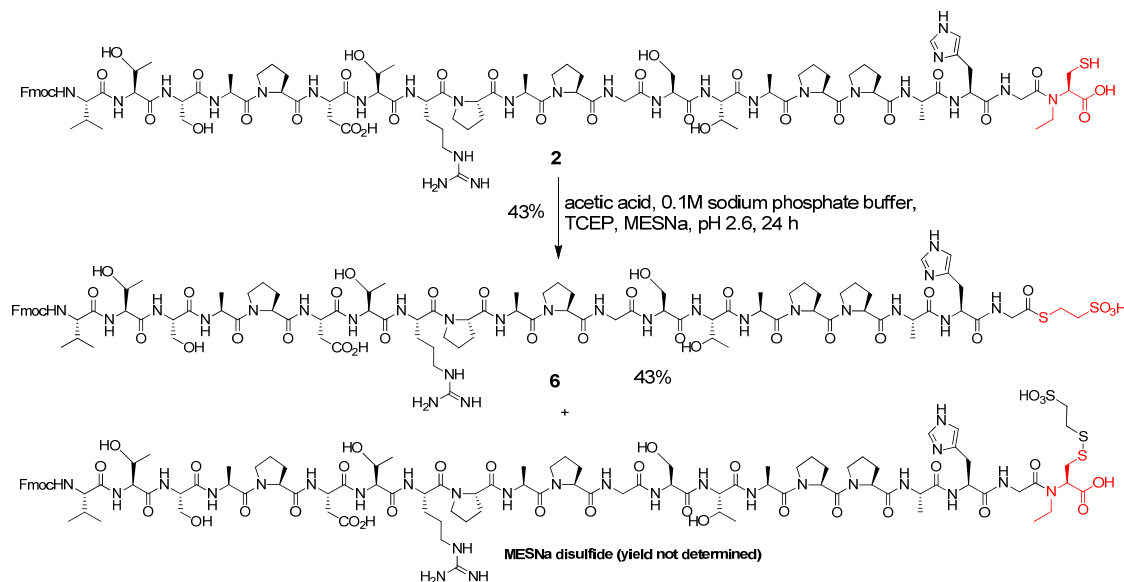

**Scheme S5.** Synthesis of peptide thioester **6** by N→S acyl transfer.

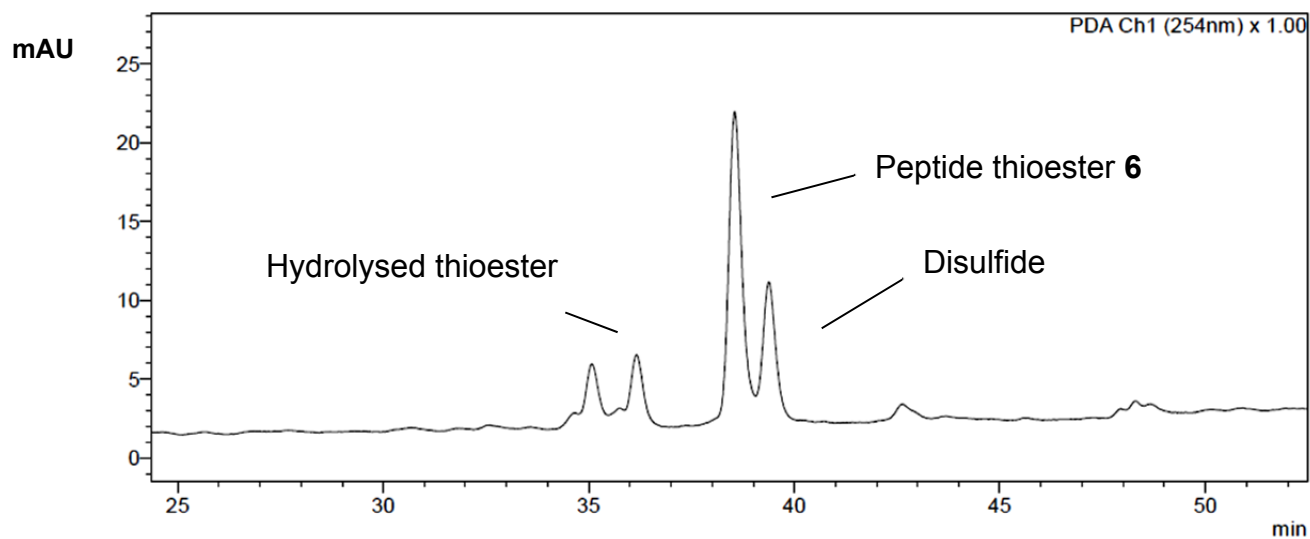

Ret. Time: 1-1(E+) [38.358->38.867]-[34.208->37.867]  
Inten.

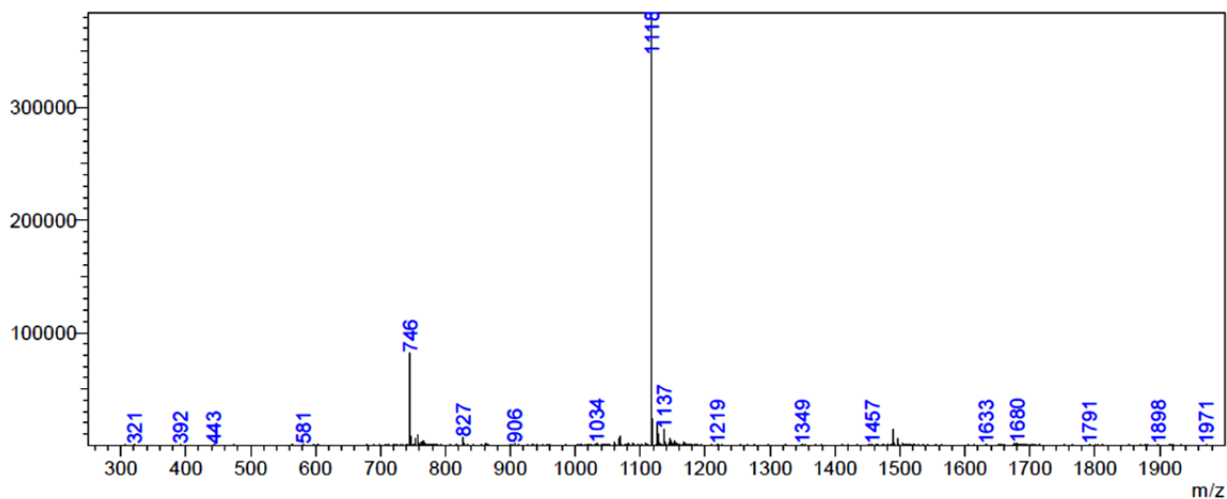

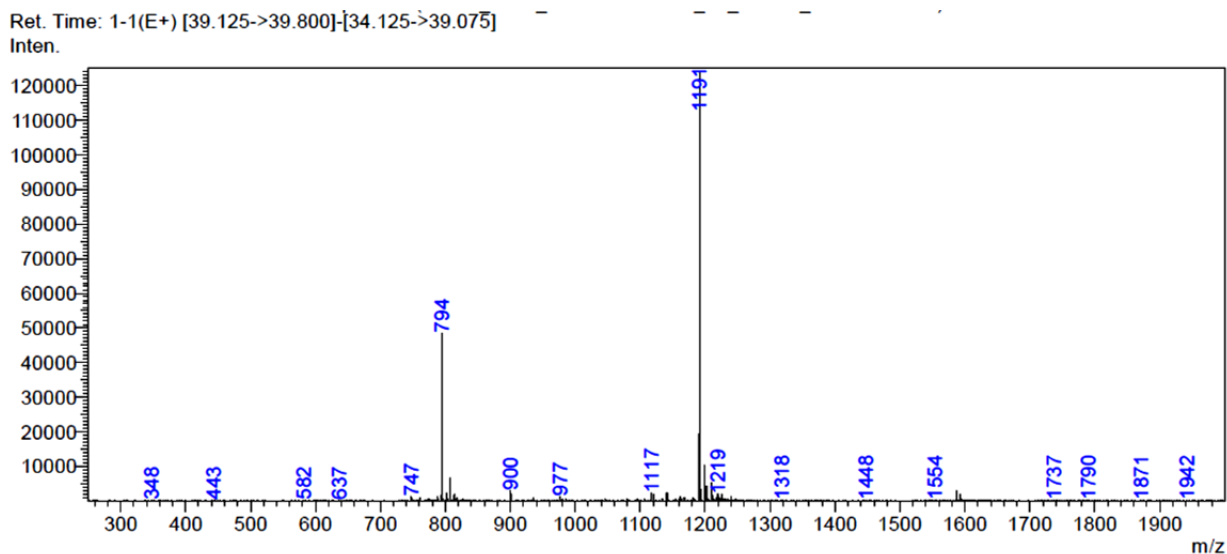

**Figure 27.** Extracted chromatogram from LC-MS of N→S thioesterification reaction after 4 h (0 to 50B over 60 min) (top), ESI-MS spectra of peptide thioester **6** (middle) and disulfide (bottom).

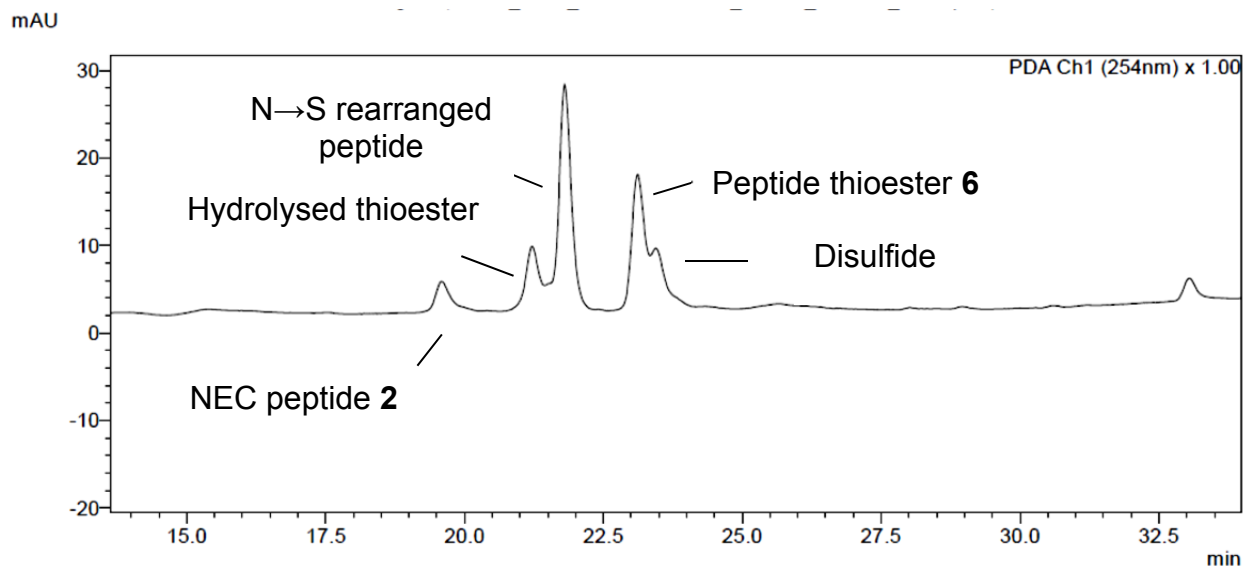

**Figure 28.** LC-MS of N→S thioesterification reaction after 4 h using 500 equiv MESNa.

**Peptide 15:** Fmoc-Val-Thr-Ser-Ala-Pro-Asp-Thr-Arg-Pro-Ala-Pro-Gly-Ser-Thr-Ala-Pro-Pro-Ala-His-Gly-Val-Thr-Ser-Ala-Pro-Asp-Thr-Arg-Pro-Ala-Pro-Gly-Ser-Thr-Ala-Pro-Pro-Ala-His-Cys(*N*-ethyl)-NH<sub>2</sub> (**15**, NB: this experiment is not described in the main text)

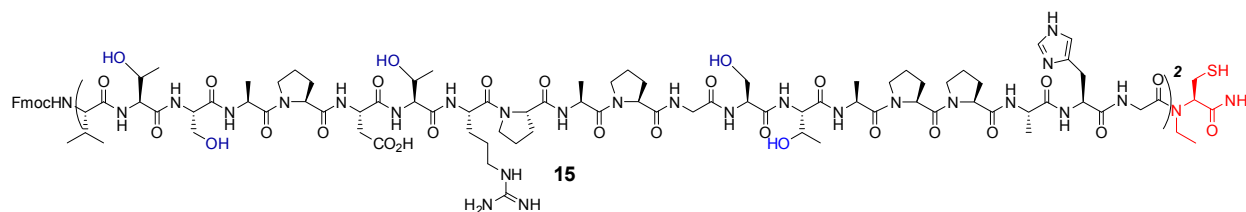

Peptide **15** was prepared by reacting unprotected peptide **4** (2.8 mg, 1.4  $\mu\text{mol}$ , 1.0 equiv) and peptide thioester **6** (3.1 mg, 1.3  $\mu\text{mol}$ , 1.2 equiv) *via* the general Ag(I)-assisted ligation procedure outlined in the general procedure to give a white solid following purification by preparative RP-HPLC (*Method C*) and lyophilisation (3.9 mg, 95  $\mu\text{mol}$ , 86%).

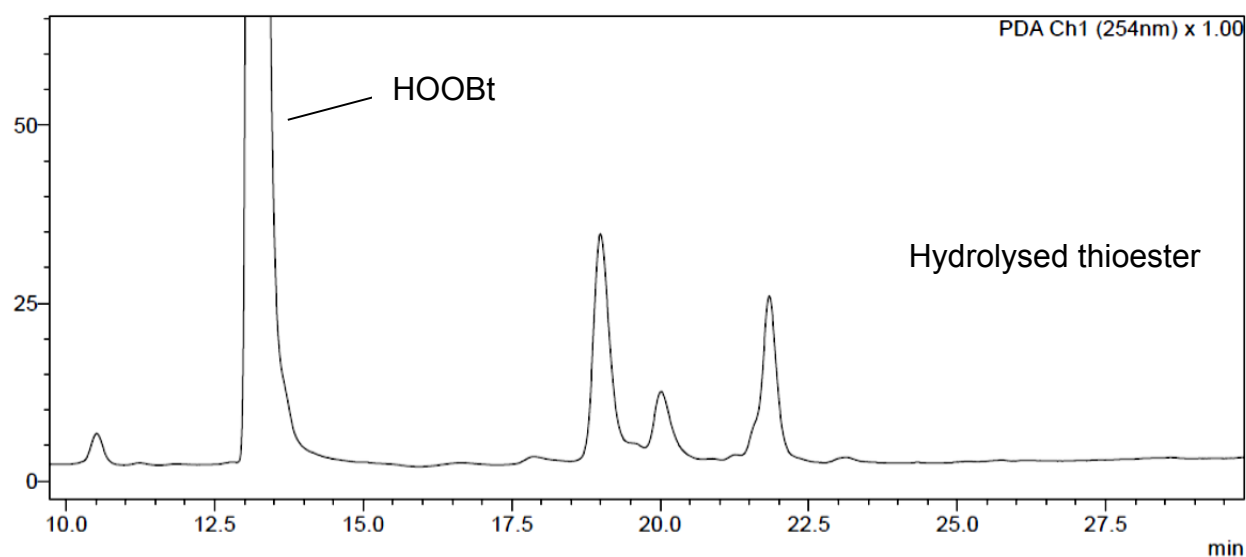

Ret. Time: 1-1(E+) [18.800->19.317]-[16.125->18.542]  
Inten.

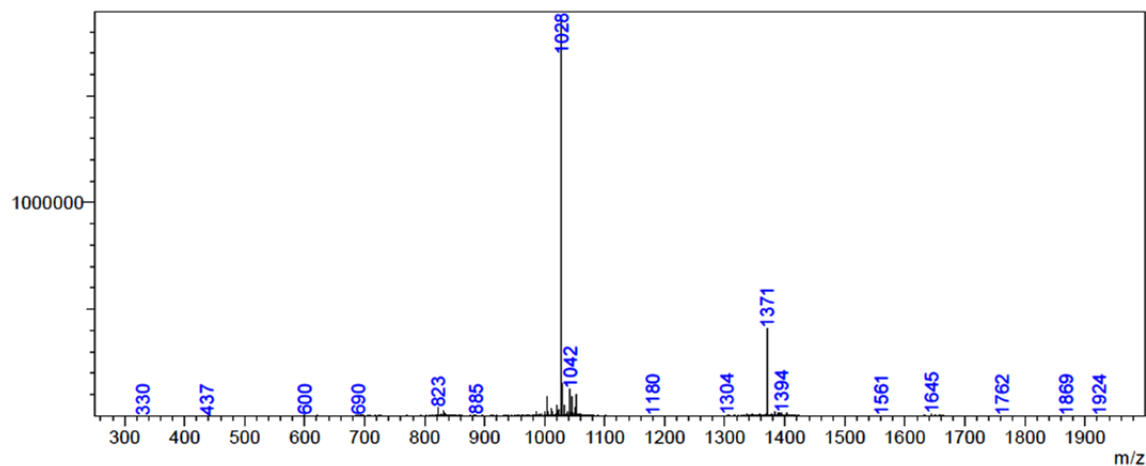

**Figure S29.** LC-MS of Ag(I)-assisted ligation after 20 h (0 to 50% B over 60 min).

**Peptide thioester 16: Fmoc-Val-Thr-Ser-Ala-Pro-Asp-Thr-Arg-Pro-Ala-Pro-Gly-Ser-Thr-Ala-Pro-Pro-Ala-His-Gly-Val-Thr-Ser-Ala-Pro-Asp-Thr-Arg-Pro-Ala-Pro-Gly-Ser-Thr-Ala-Pro-Pro-Ala-His-Gly-S(CH<sub>2</sub>)<sub>2</sub>SO<sub>3</sub>H (16, NB: this experiment is not described in the main text)**

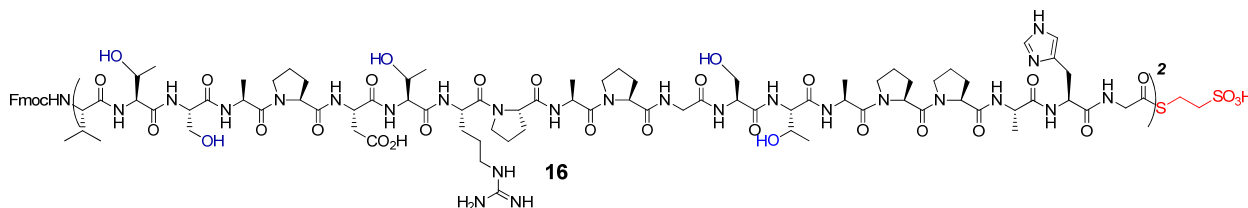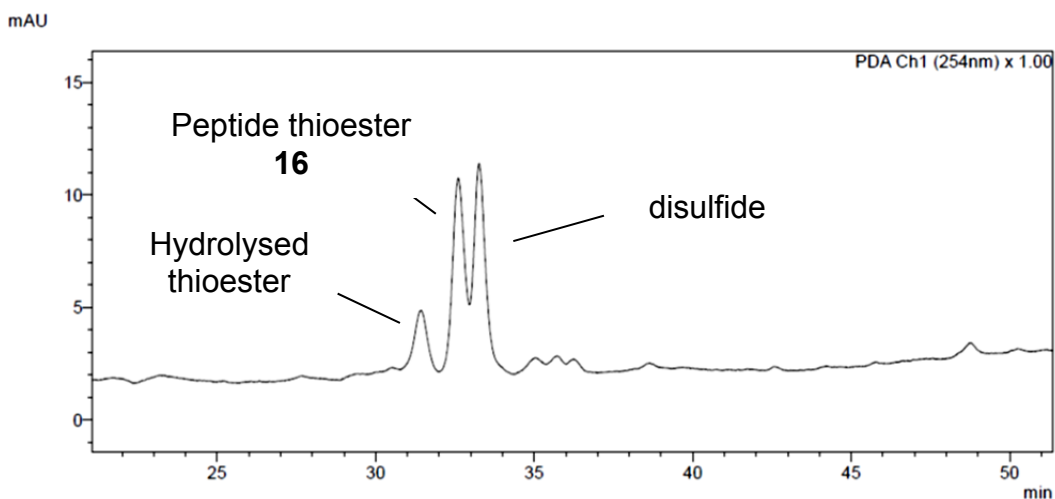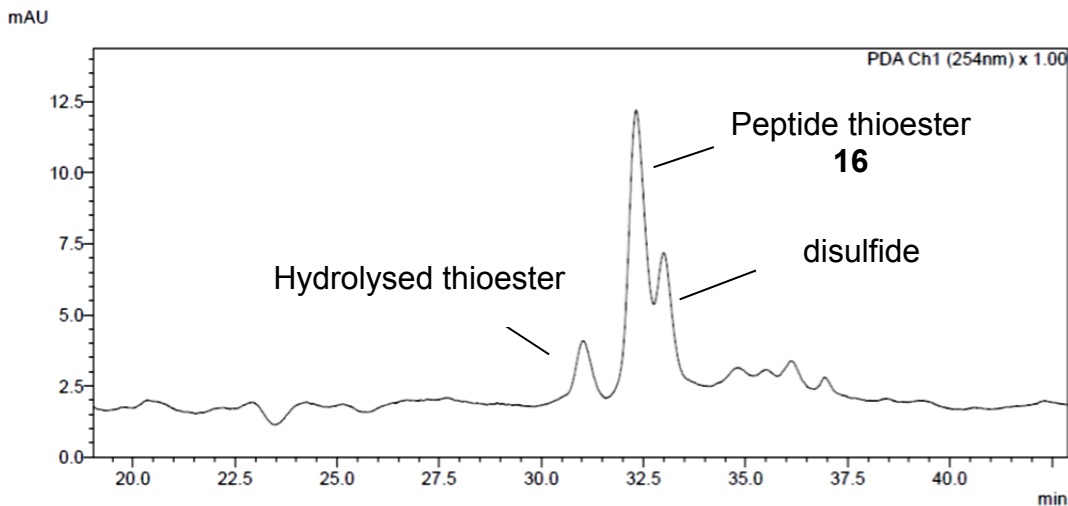

**Figure 30.** LC-MS of N→S thioesterification reaction after 4 h (0to50B over 60 min) (top) and after 16 h (bottom).

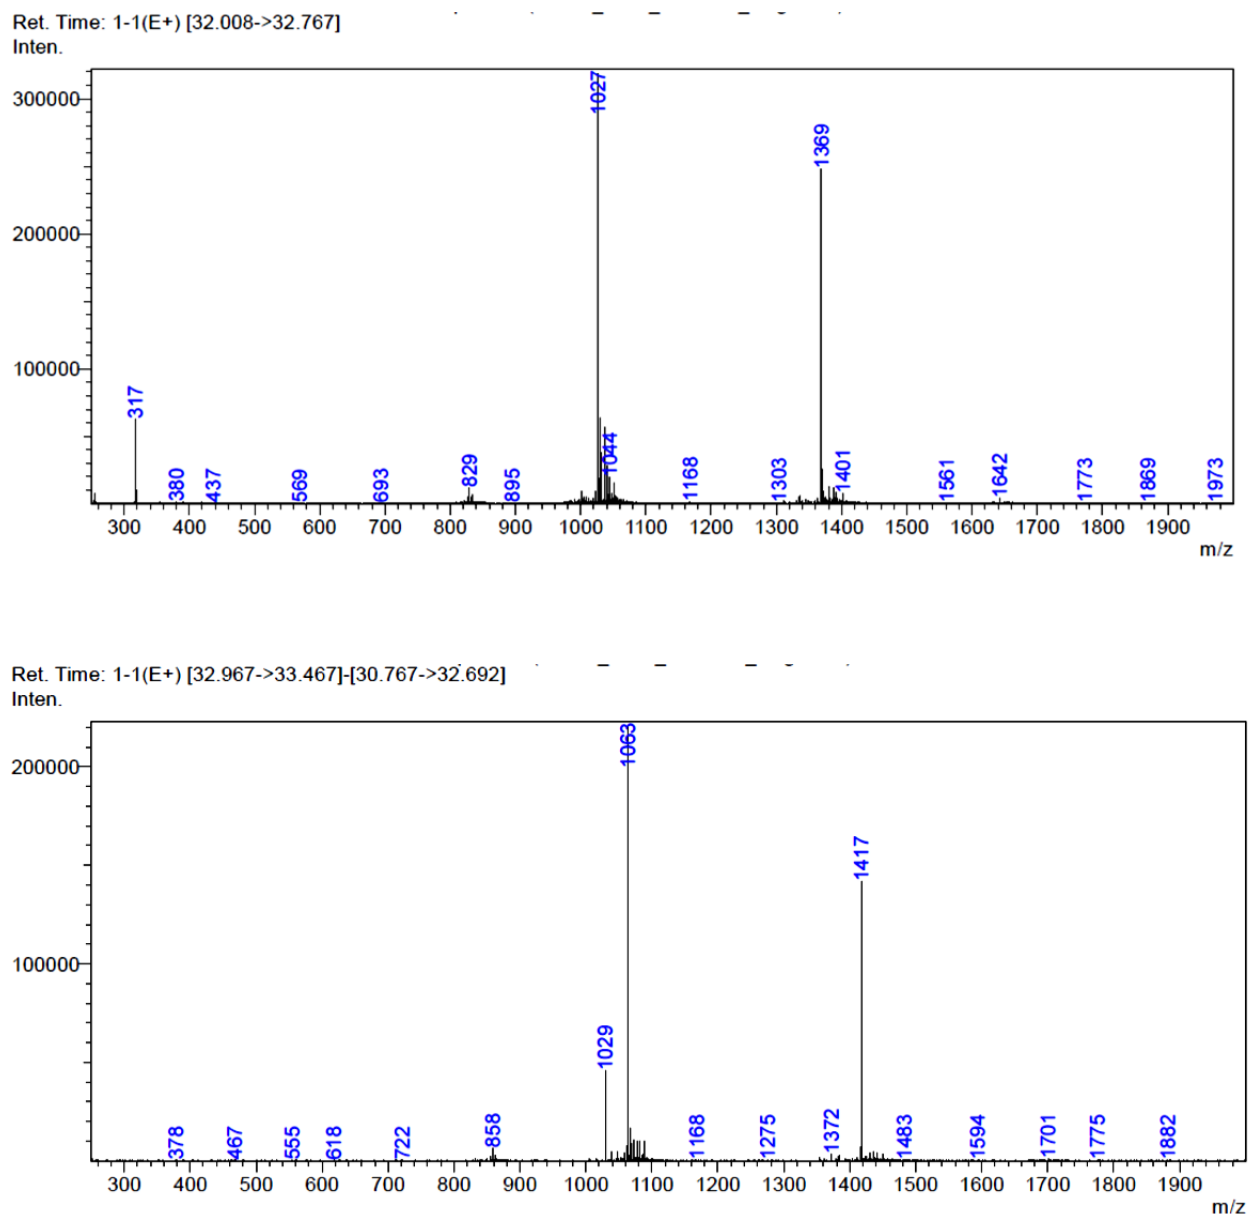

**Figure 31.** ESI-MS spectra of peptide thioester **16** (top) and disulfide (bottom).

## References:

1. H. Hironobu, N. Yoshiaka, WO2008044628 (A1), 2008-4-17

| MUC1 code               | Formula                                                                          | MALDI-MS                      |                                 |                 | ESI-MS                      |                          |                 |
|-------------------------|----------------------------------------------------------------------------------|-------------------------------|---------------------------------|-----------------|-----------------------------|--------------------------|-----------------|
|                         |                                                                                  | Exact mass from formula [M+H] | MALDI-TOF MS [M+H] <sup>+</sup> | Deviation (ppm) | Exact mass from formula [M] | ESI-Q-TOF MS [M]         | Deviation (ppm) |
| MUC1 VNTR (7)           | C <sub>80</sub> H <sub>127</sub> N <sub>25</sub> O <sub>28</sub>                 | 1886.94 <sup>1</sup>          | 1886.81 <sup>1,3</sup>          | 69              | 1885.9282 <sup>1</sup>      | 1885.9378 <sup>1,5</sup> | 5.0             |
| (1)                     | C <sub>98</sub> H <sub>142</sub> N <sub>26</sub> O <sub>31</sub> S               | 2212.01 <sup>1</sup>          | 2211.94 <sup>1,3</sup>          | 32              | 2211.0055 <sup>1</sup>      | 2211.0094 <sup>1,5</sup> | 1.7             |
| MUC1 VNTR thioester (6) | C <sub>97</sub> H <sub>141</sub> N <sub>25</sub> O <sub>32</sub> S <sub>2</sub>  | 2232.97 <sup>1</sup>          | 2233.23 <sup>1,3</sup>          | 116             | 2231.9616 <sup>1</sup>      | 2231.9646 <sup>1,5</sup> | 1.3             |
| (8)                     | C <sub>178</sub> H <sub>267</sub> N <sub>51</sub> O <sub>58</sub> S              | 4082.46 <sup>2</sup>          | 4082.93 <sup>2,3</sup>          | 115             | 4078.9232 <sup>1</sup>      | 4078.9310 <sup>1,5</sup> | 1.9             |
| (10)                    | C <sub>177</sub> H <sub>266</sub> N <sub>50</sub> O <sub>59</sub> S <sub>2</sub> | 4103.50 <sup>2</sup>          | 4103.64 <sup>2,3</sup>          | 34              | 4099.8793 <sup>1</sup>      | 4099.8783 <sup>1,5</sup> | 0.2             |
| MUC1 VNTR trimer (12)   | C <sub>240</sub> H <sub>377</sub> N <sub>75</sub> O <sub>82</sub>                | 5626.09 <sup>2</sup>          | 5626.73 <sup>2,4</sup>          | 114             | 5621.7636 <sup>1</sup>      | 5621.7942 <sup>1,5</sup> | 5.4             |
| MUC1 VNTR tetramer (13) | C <sub>320</sub> H <sub>502</sub> N <sub>100</sub> O <sub>109</sub>              | 7495.12 <sup>2</sup>          | 7496.86 <sup>2,4</sup>          | 232             | 7489.6812 <sup>1</sup>      | 7489.7274 <sup>1,5</sup> | 6.1             |
| MUC1 VNTR pentamer (14) | C <sub>400</sub> H <sub>627</sub> N <sub>125</sub> O <sub>136</sub>              | 9364.14 <sup>2</sup>          | 9367.13 <sup>2,4</sup>          | 320             | 9357.5989 <sup>1</sup>      | 9357.6455 <sup>1,5</sup> | 4.9             |

1) Monoisotopic mass, 2) Average mass, 3) Reflectron mode, 4) Linear mode, 5) Direct infusion
